# Supplementary material
Source: Royal Society of Chemistry journal article supplement (doi:10.1039/d6ob00395h)
Supplement: d6ob00395h1.pdf [file d6ob00395h1.pdf]

## Supporting Information

### One-Pot Multicomponent Synthesis of Indole-Linked Fully Substituted Fused-Pyrroles

Swadhin Swaraj Acharya,<sup>a</sup> Rudranarayan Sutar,<sup>a</sup> Girija Prasad Mishra<sup>b</sup> and Bibhuti Bhusan Parida\*<sup>a</sup>

<sup>a</sup>*Organic Synthesis Laboratory, P. G. Department of Chemistry, Berhampur University, Bhanja Bihar, Berhampur, Odisha, India-76007*

<sup>b</sup>*Department of Chemistry, Kendrapara Autonomous College, Kendrapara, Odisha, India-754211*

Email: [bbp.chem@buodisha.edu.in](mailto:bbp.chem@buodisha.edu.in) / [bbparida80@gmail.com](mailto:bbparida80@gmail.com)

#### Table of Contents:

| Sl. No. | Contents                  | Pages    |
|---------|---------------------------|----------|
| 01      | NMR data                  | S 2-S 23 |
| 02      | Green metrics calculation | S 25     |
| 03      | References                | S 26     |

<sup>1</sup>H, and <sup>13</sup>C{<sup>1</sup>H} NMR spectra of **5a**

# Supporting Information

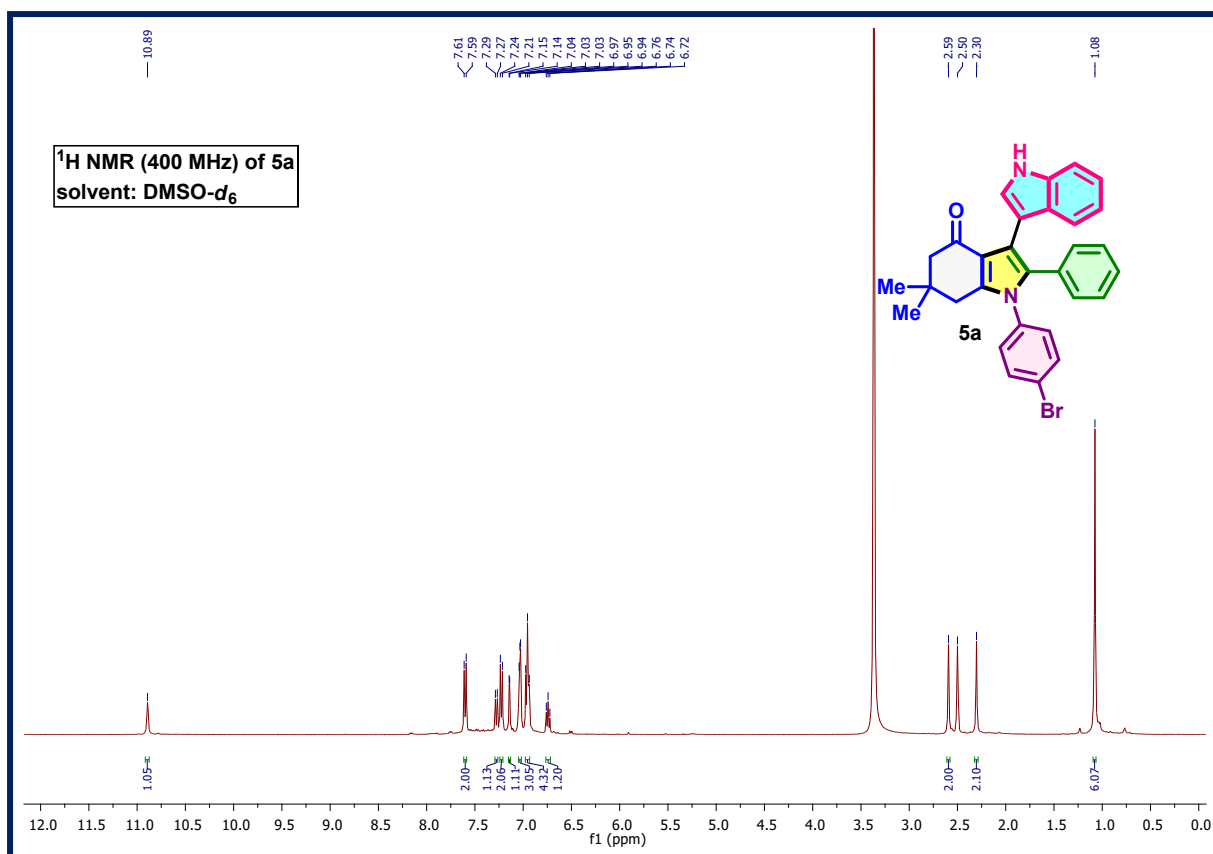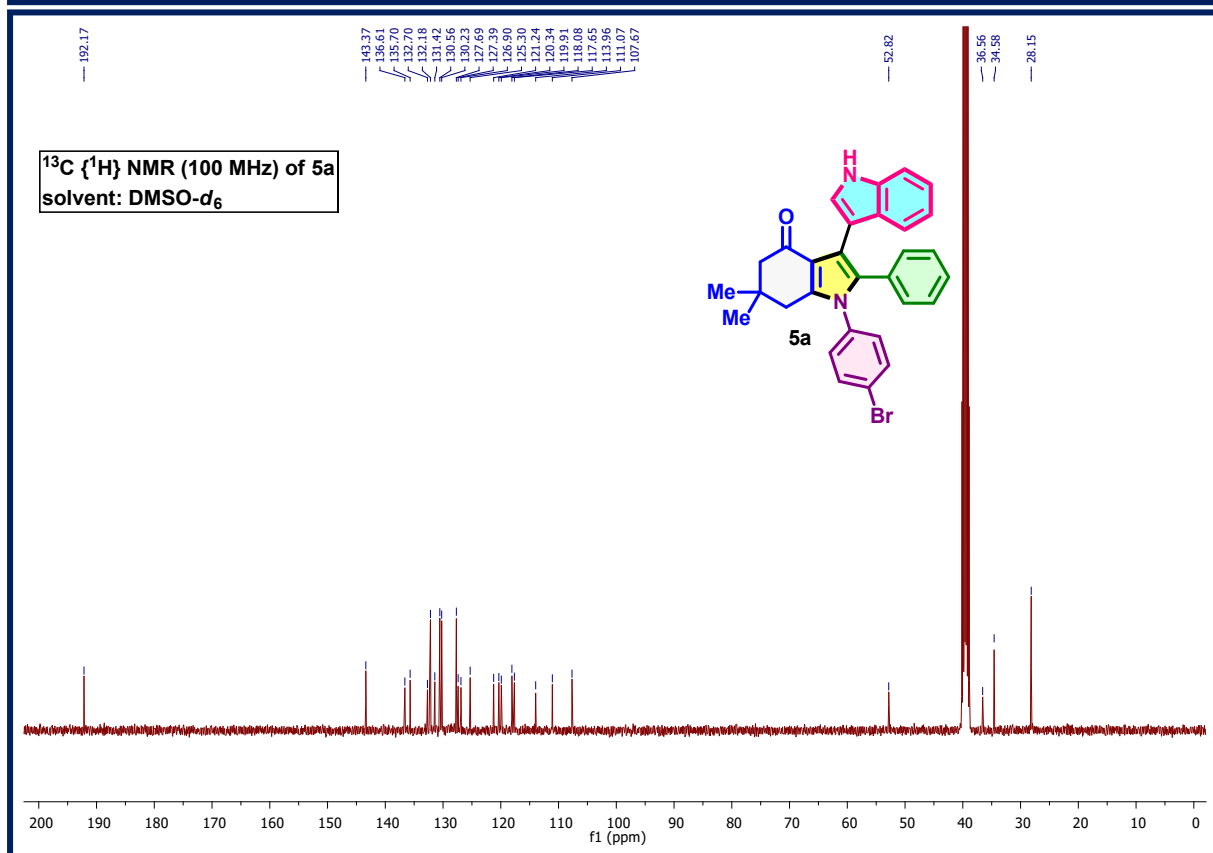

$^1\text{H}$ , and  $^{13}\text{C}\{^1\text{H}\}$  NMR spectra of **5b**

# Supporting Information

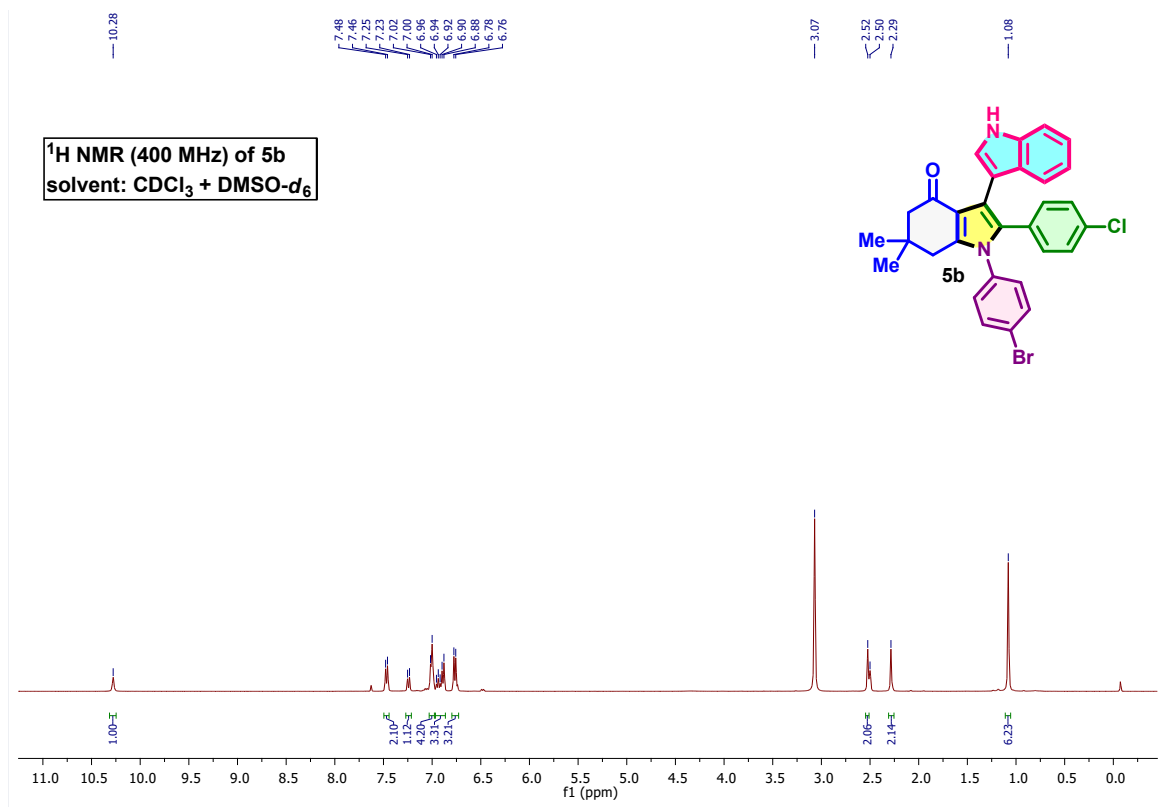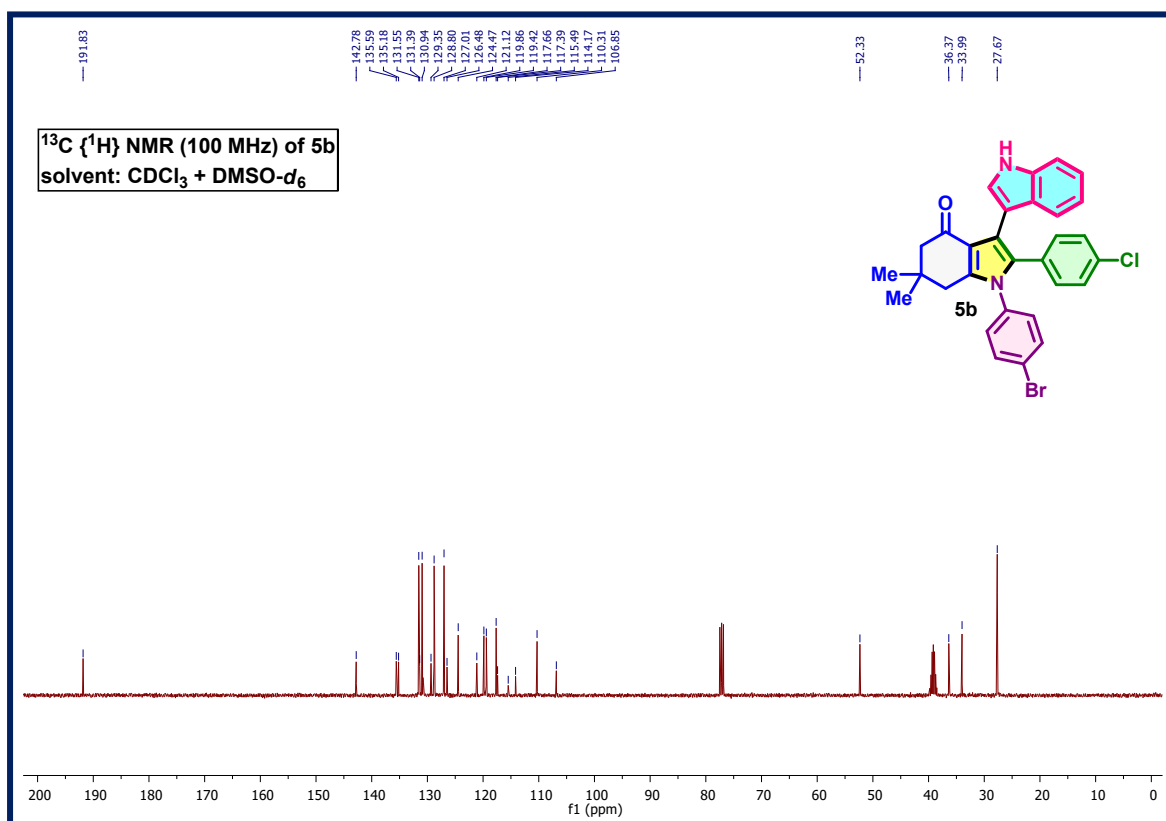

$^1\text{H}$ , and  $^{13}\text{C}\{^1\text{H}\}$  NMR spectra of 5c

**$^1\text{H}$  NMR (400 MHz) of 5c**  
solvent:  $\text{CDCl}_3$

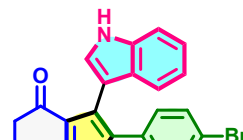

# Supporting Information

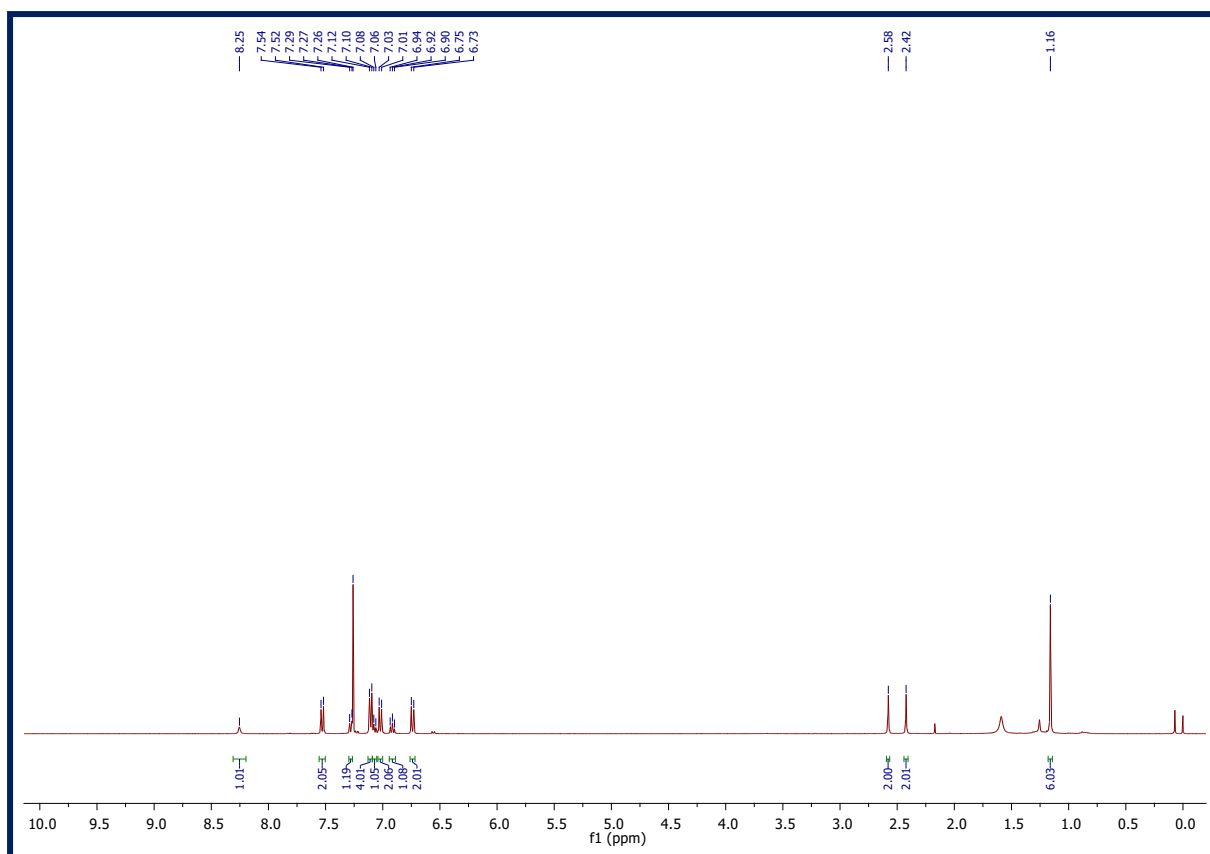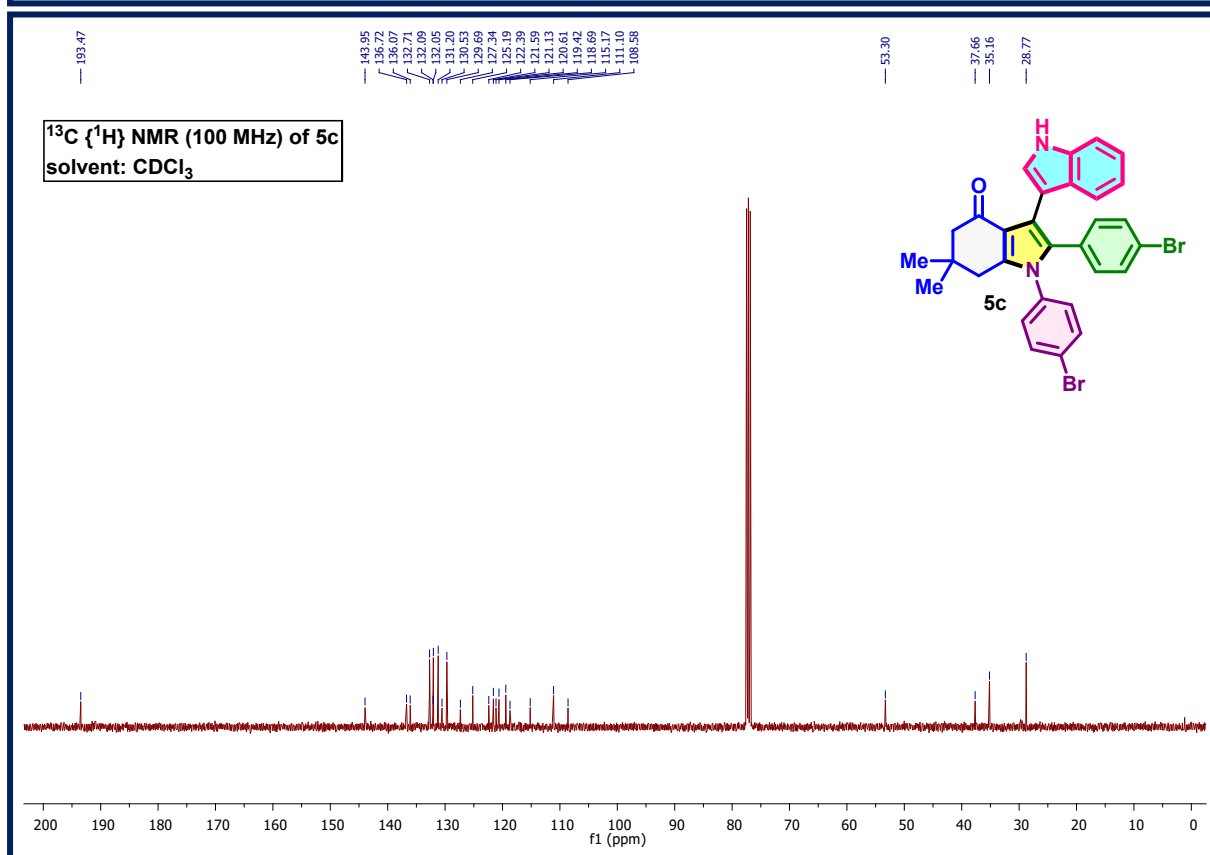

$^1\text{H}$ , and  $^{13}\text{C}$ { $^1\text{H}$ } NMR spectra of **5d**

# Supporting Information

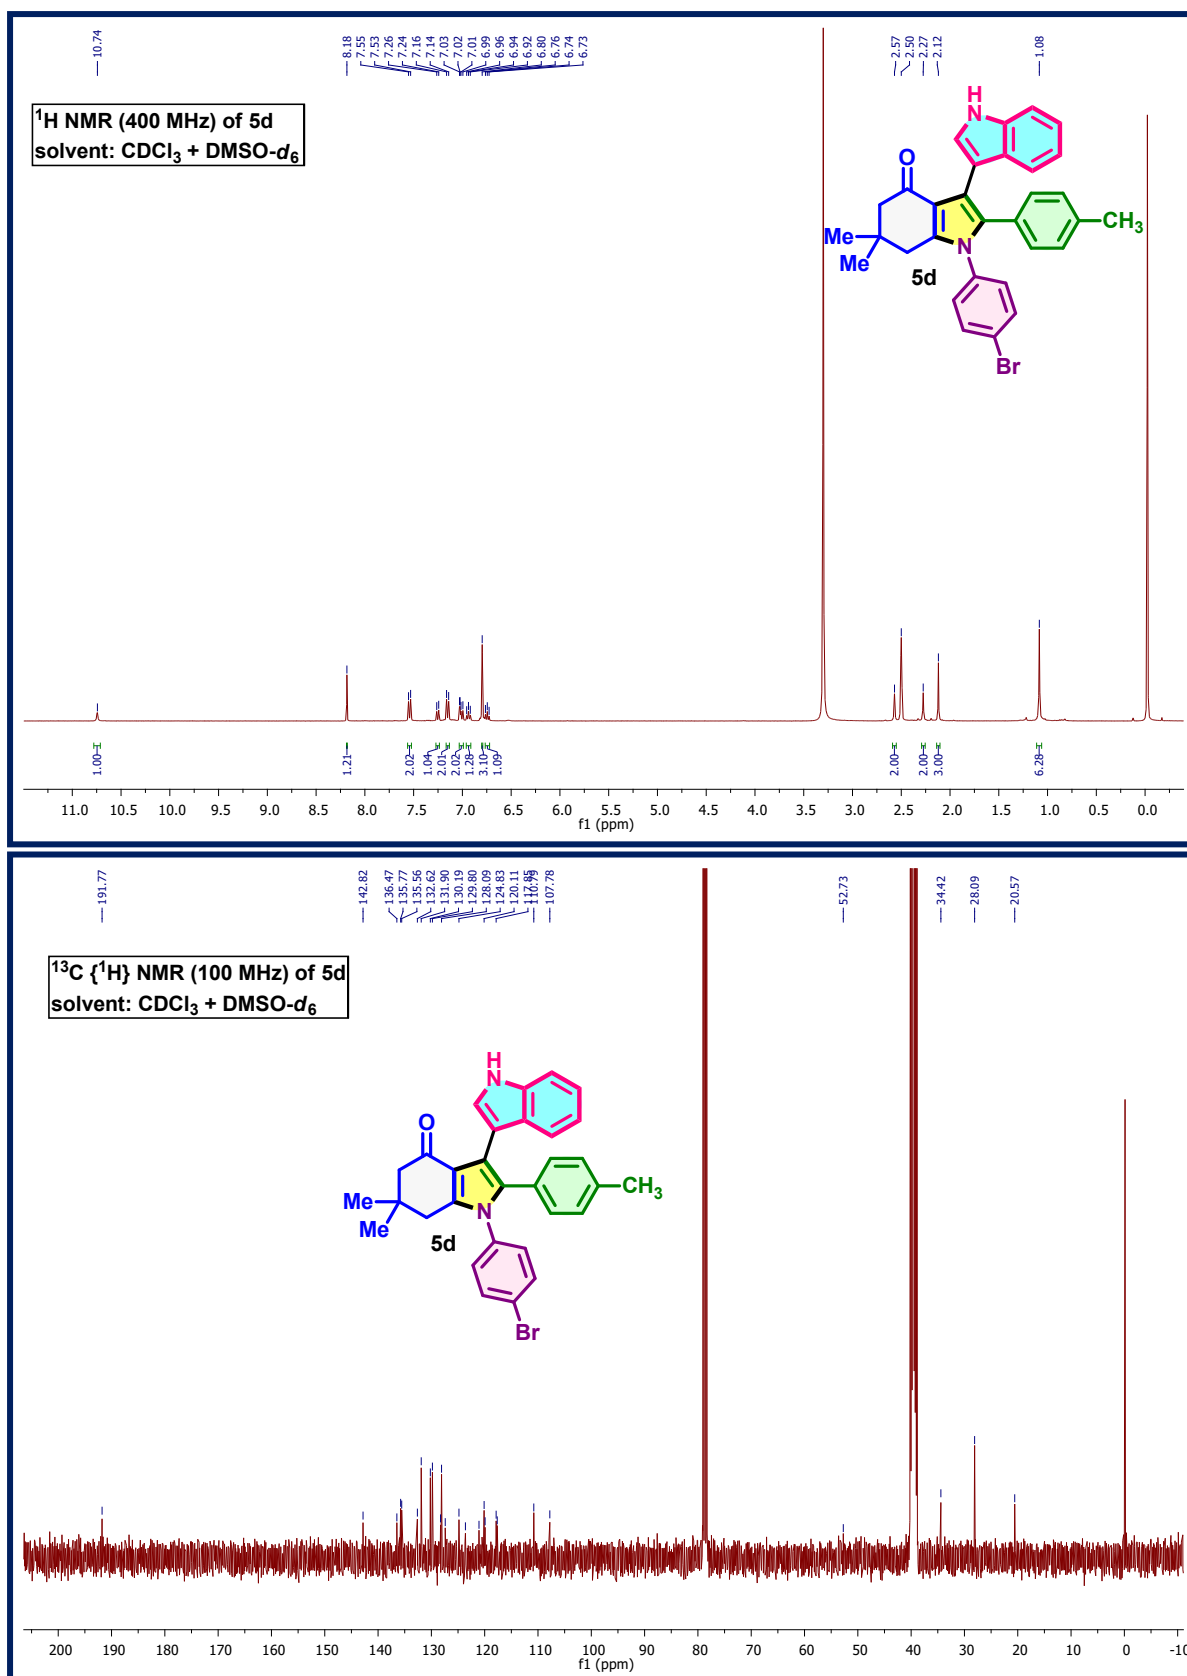

$^1\text{H}$ , and  $^{13}\text{C}\{^1\text{H}\}$  NMR spectra of 5e

# Supporting Information

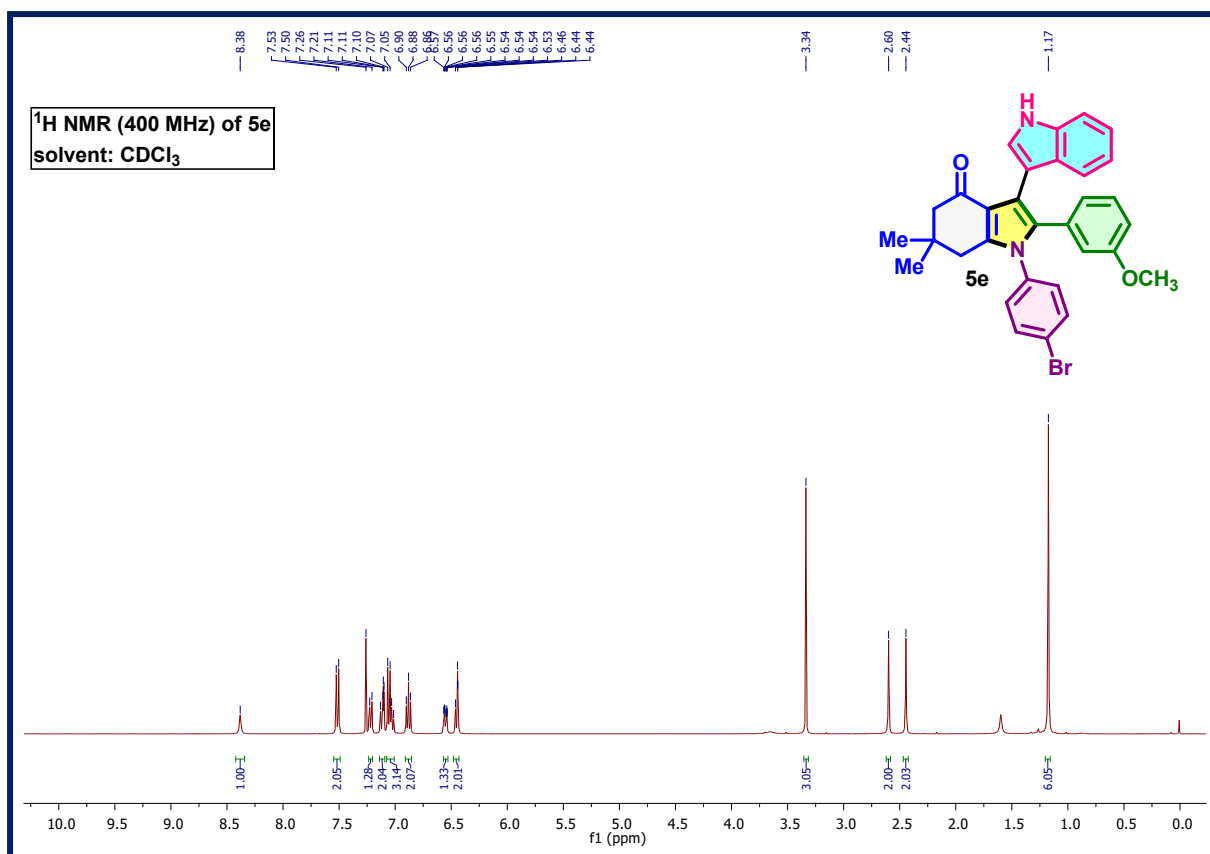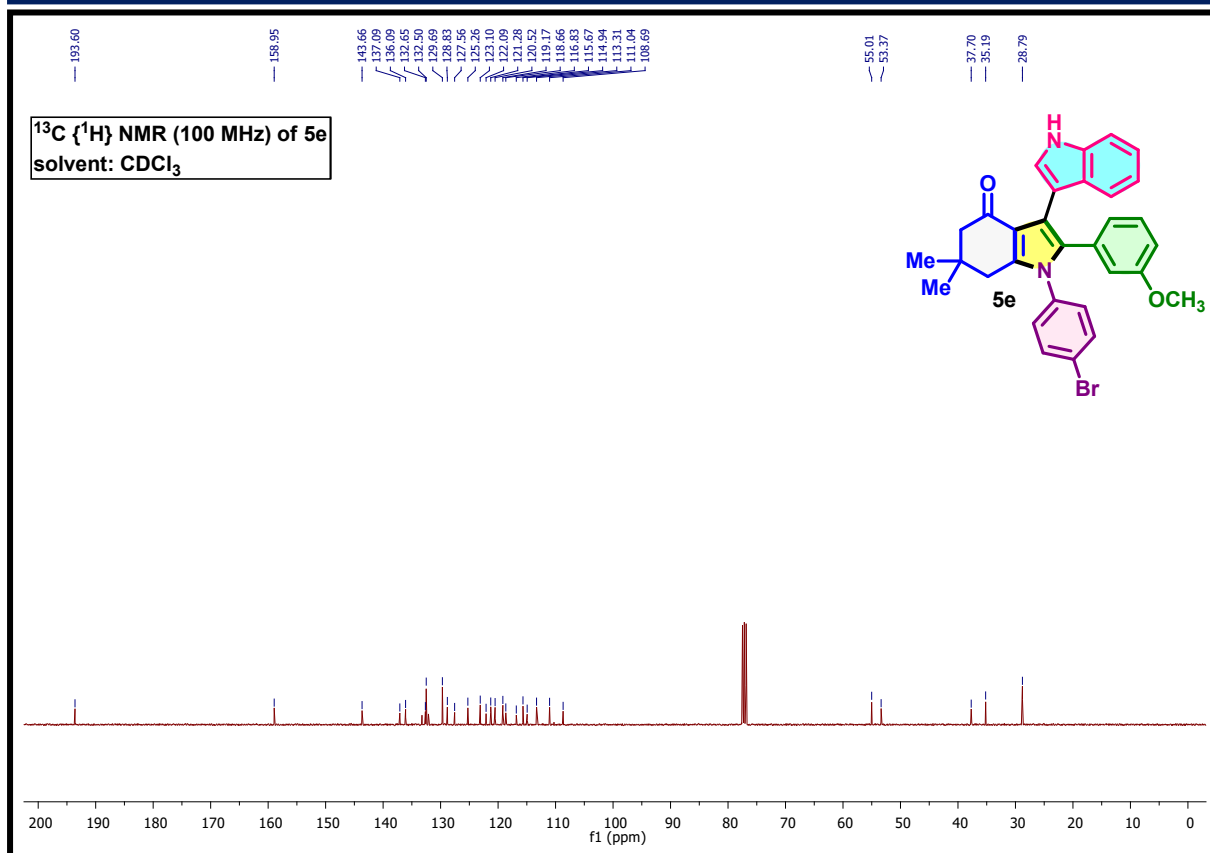

$^1\text{H}$ , and  $^{13}\text{C}\{^1\text{H}\}$  NMR spectra of **5f**

# Supporting Information

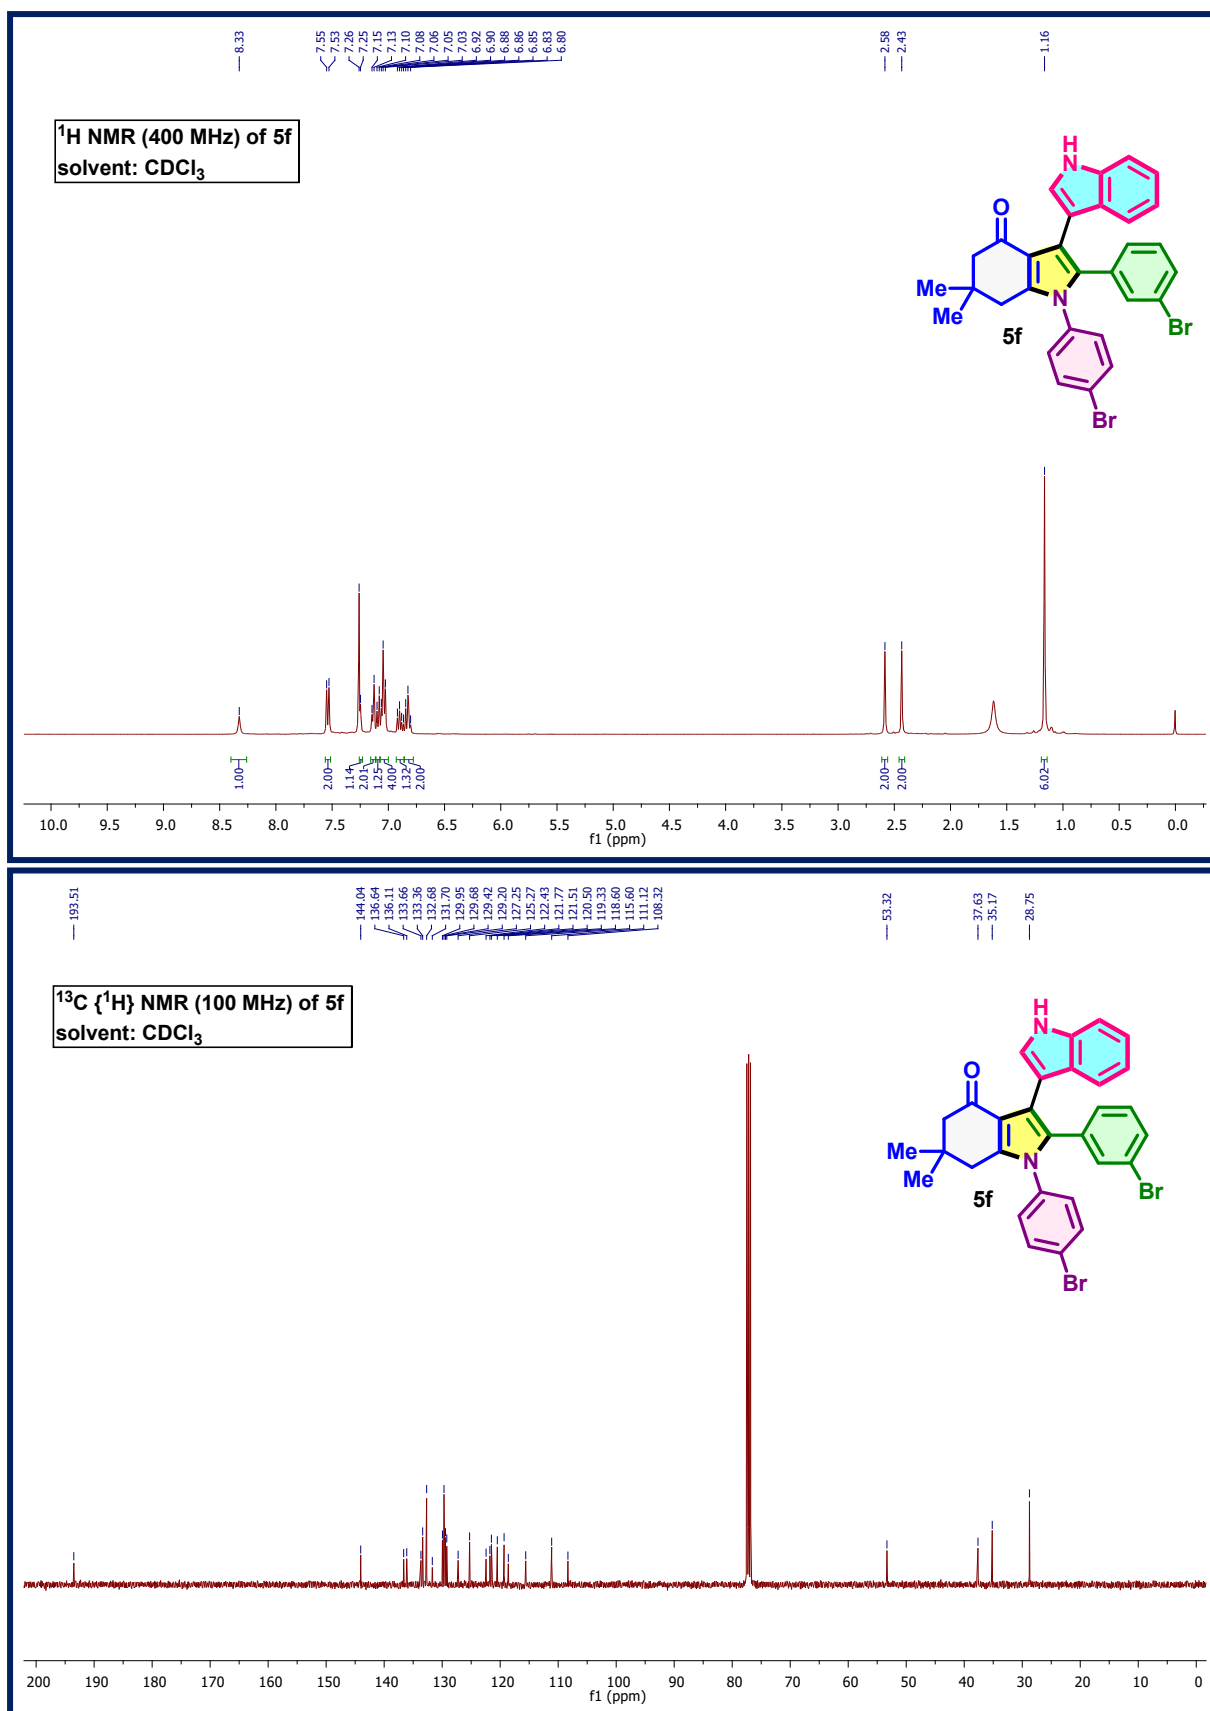

<sup>1</sup>H, and <sup>13</sup>C {<sup>1</sup>H} NMR spectra of 5g

## Supporting Information

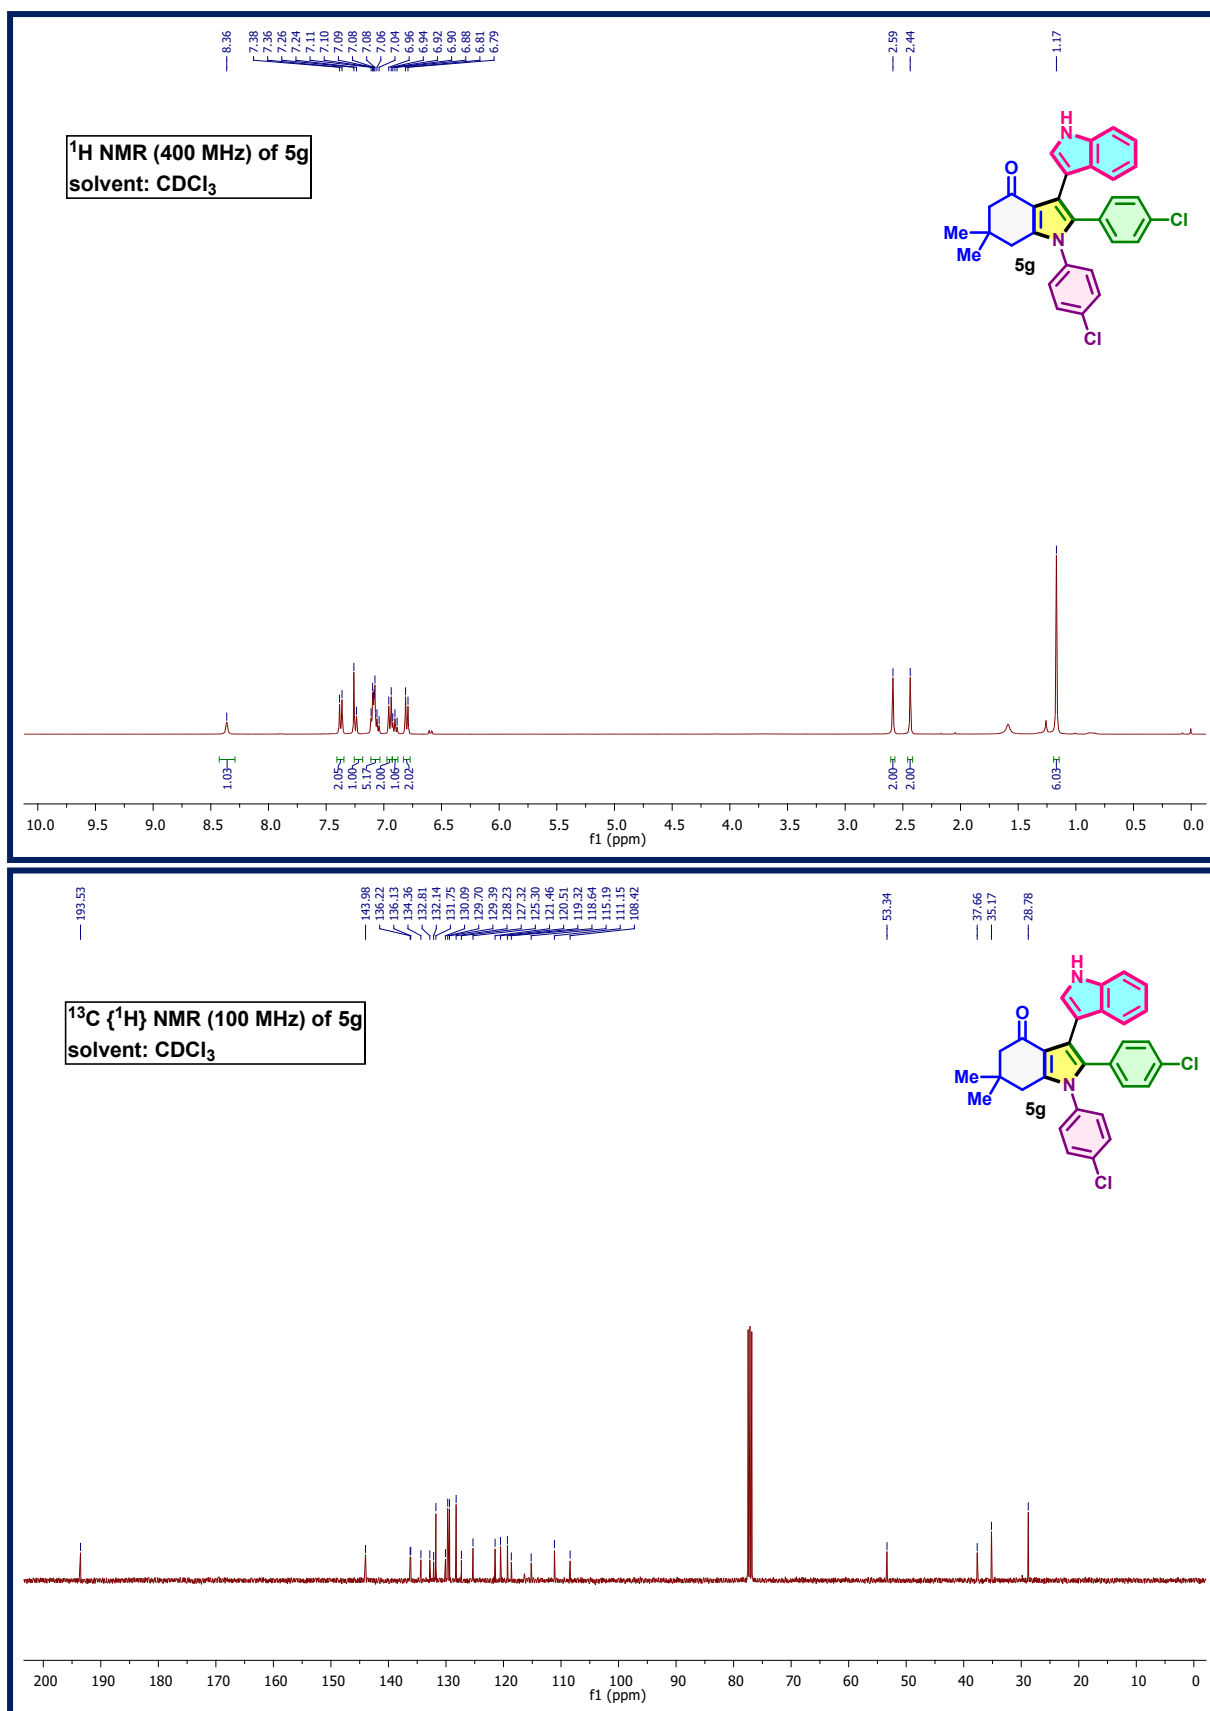

$^1\text{H}$ , and  $^{13}\text{C}\{^1\text{H}\}$  NMR spectra of 5h

# Supporting Information

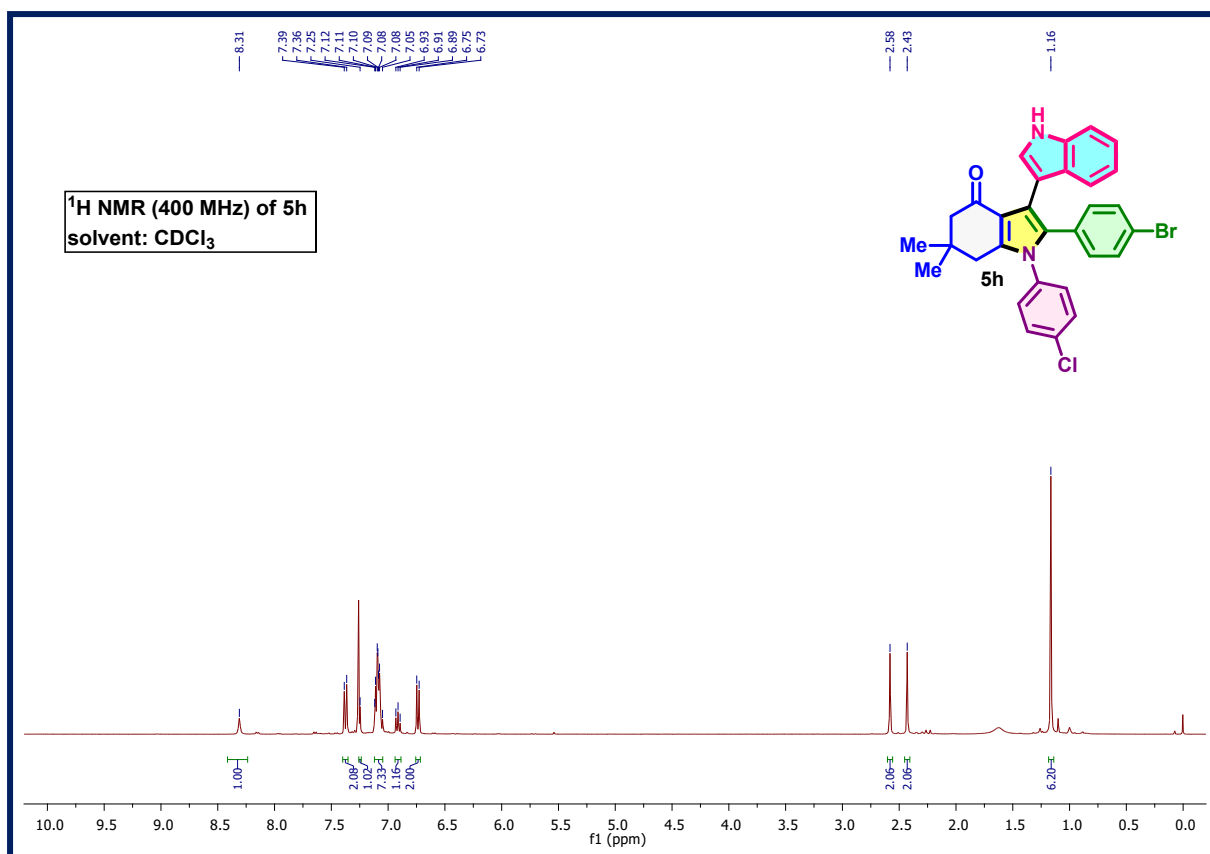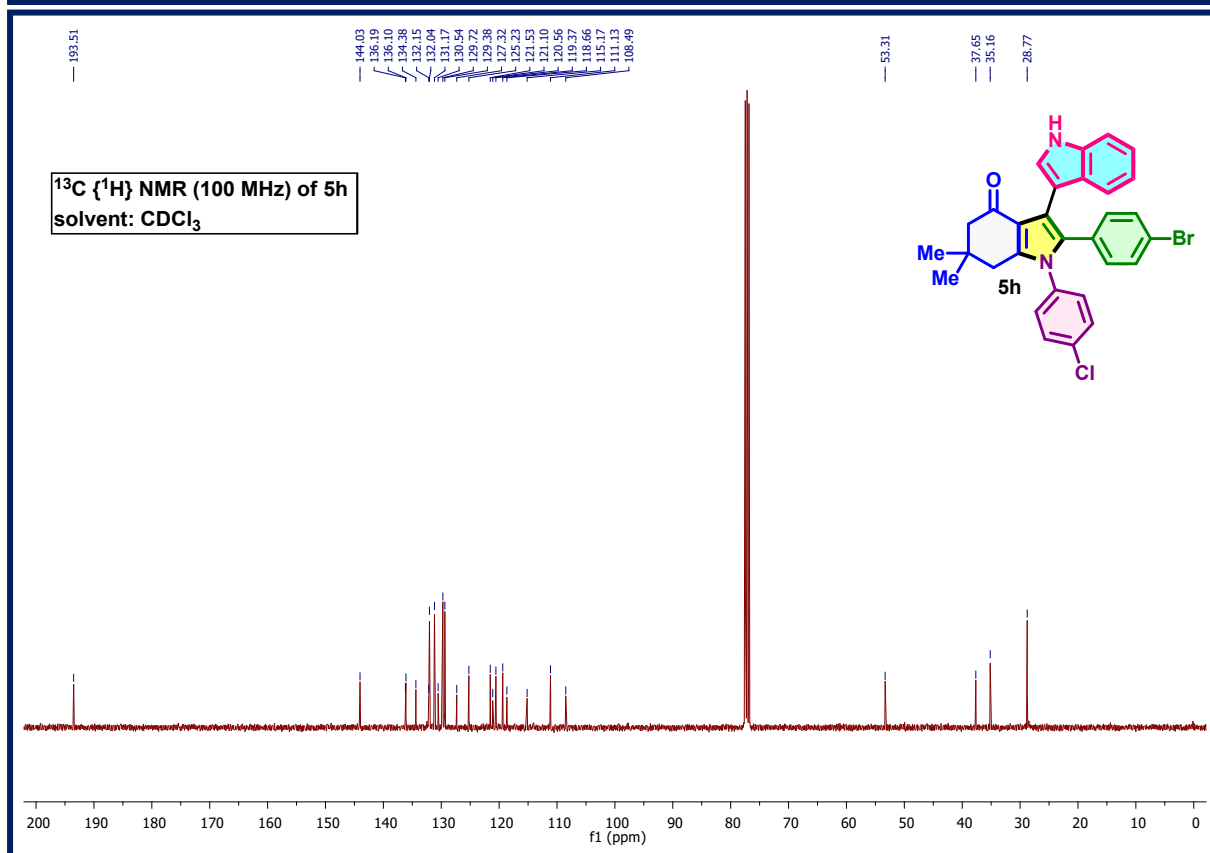

$^1\text{H}$ , and  $^{13}\text{C}\{^1\text{H}\}$  NMR spectra of **5i**

**$^1\text{H}$  NMR (400 MHz) of 5i**  
solvent:  $\text{CDCl}_3$

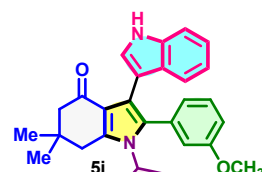

# Supporting Information

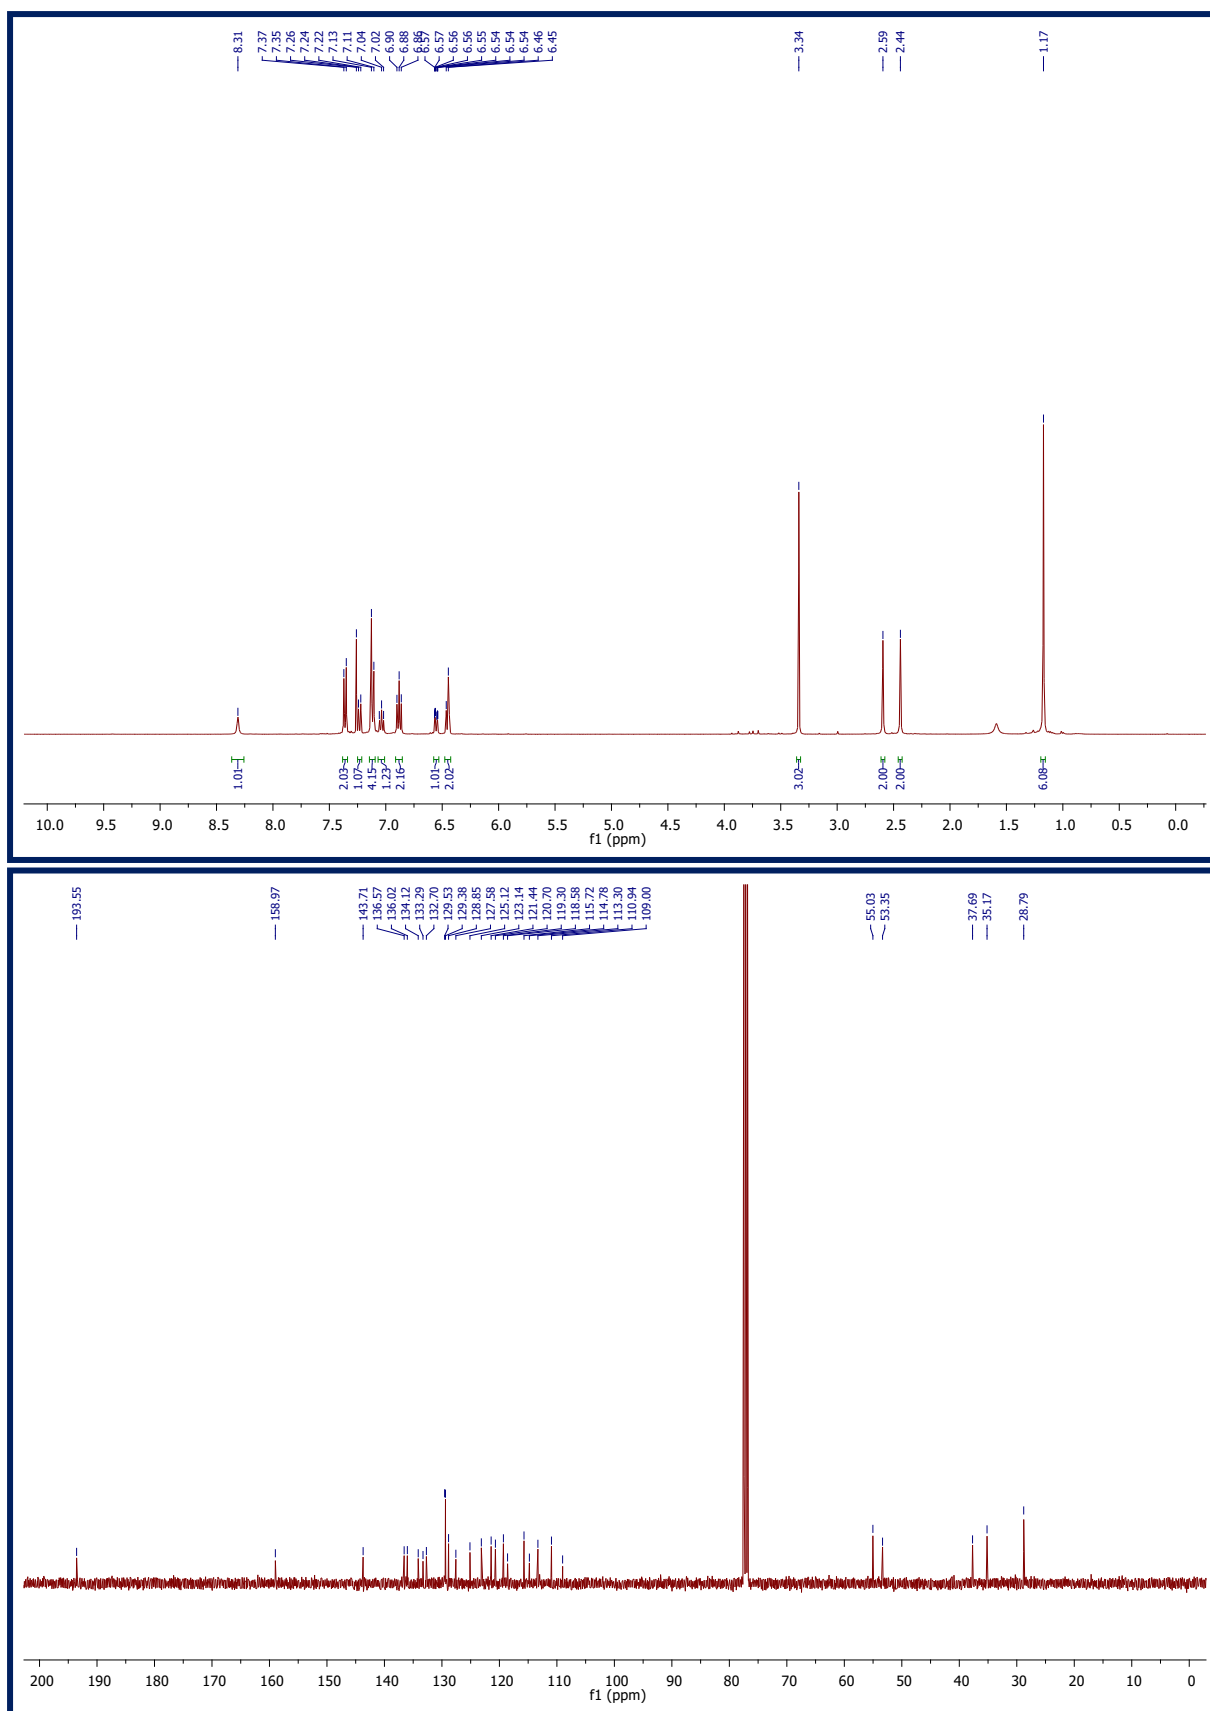

$^1\text{H}$ , and  $^{13}\text{C}\{^1\text{H}\}$  NMR spectra of **5j**

# Supporting Information

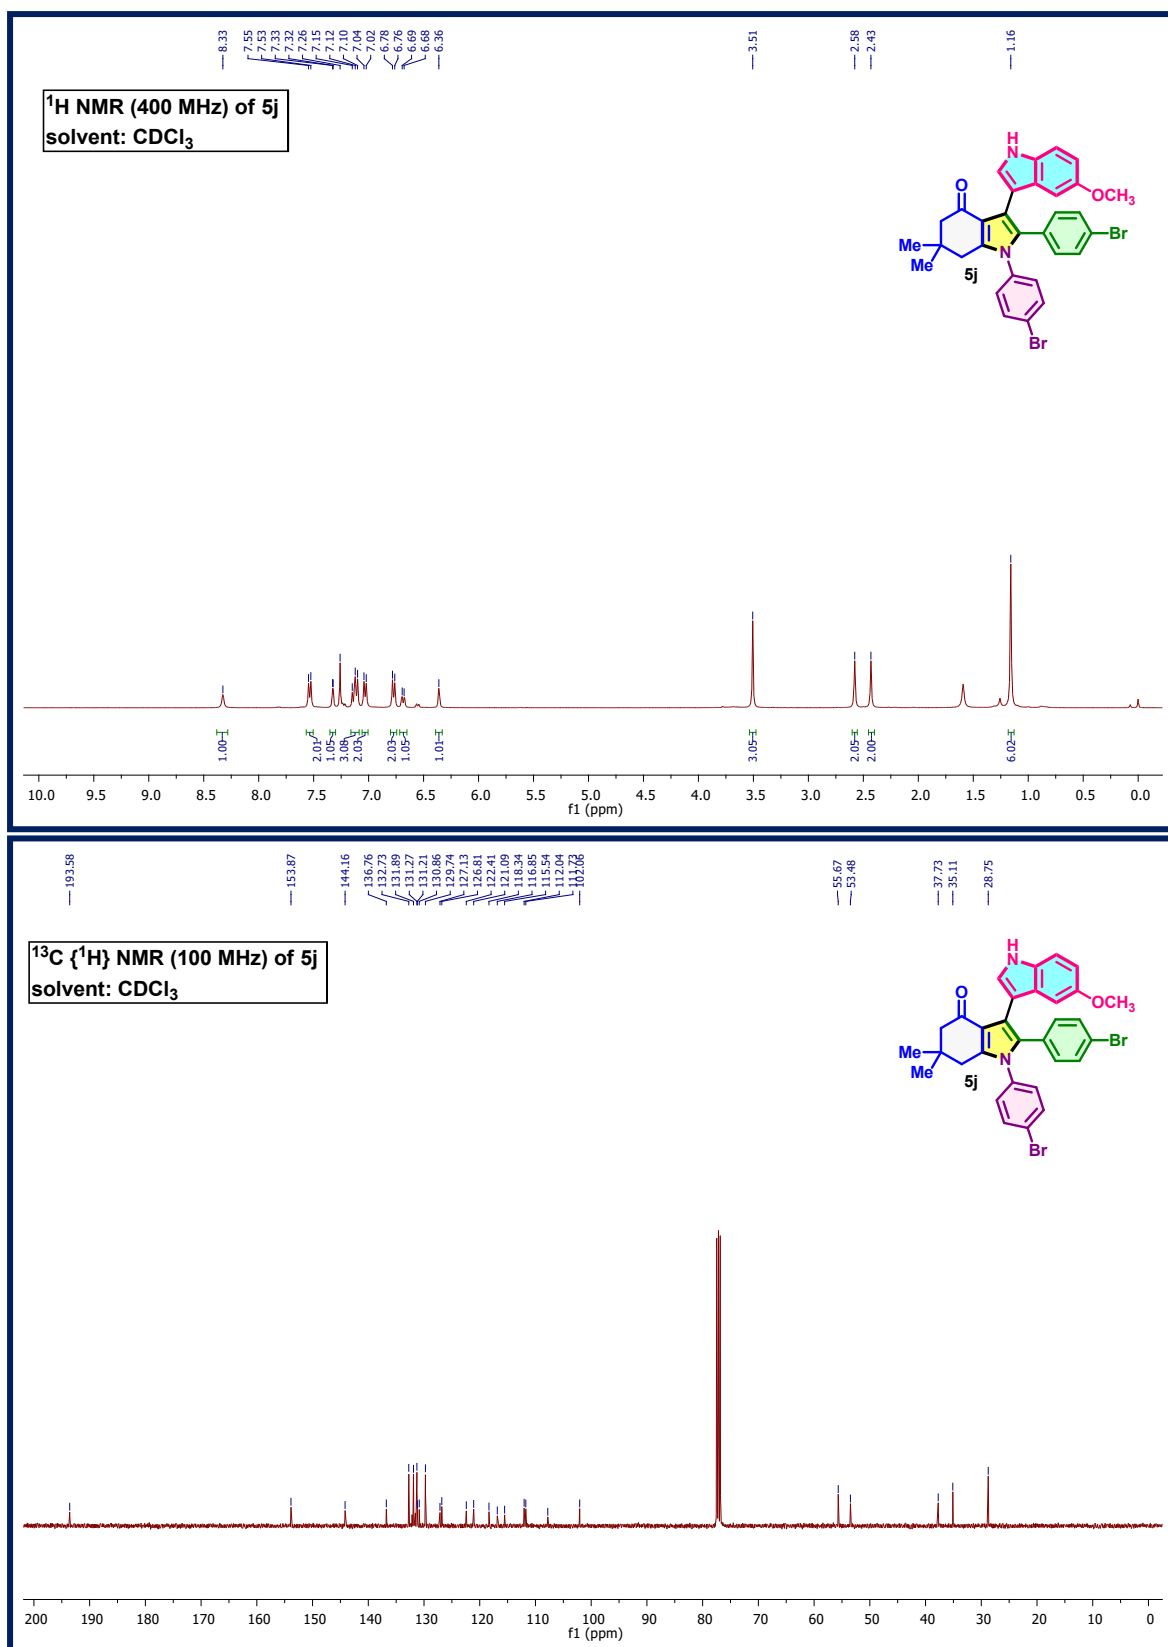

$^1\text{H}$ , and  $^{13}\text{C}\{^1\text{H}\}$  NMR spectra of 5k

# Supporting Information

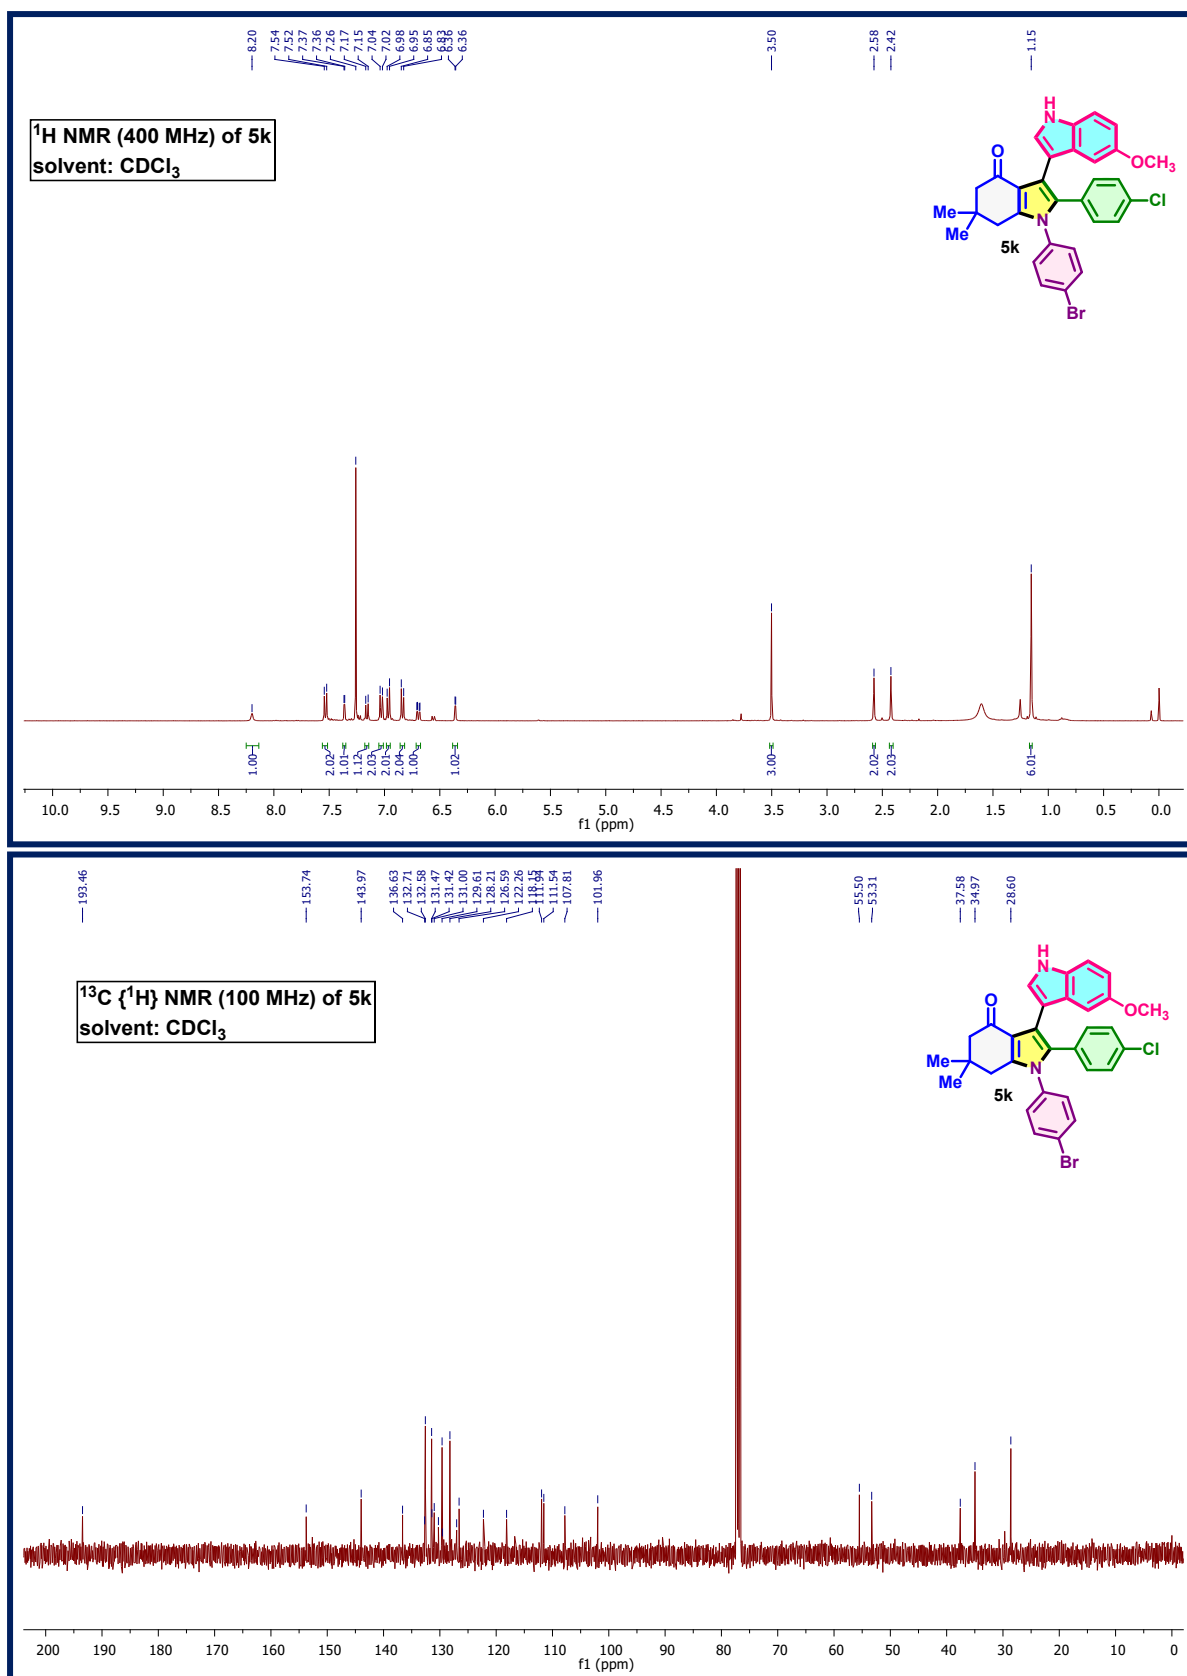

$^1\text{H}$ , and  $^{13}\text{C}\{^1\text{H}\}$  NMR spectra of **5l**

# Supporting Information

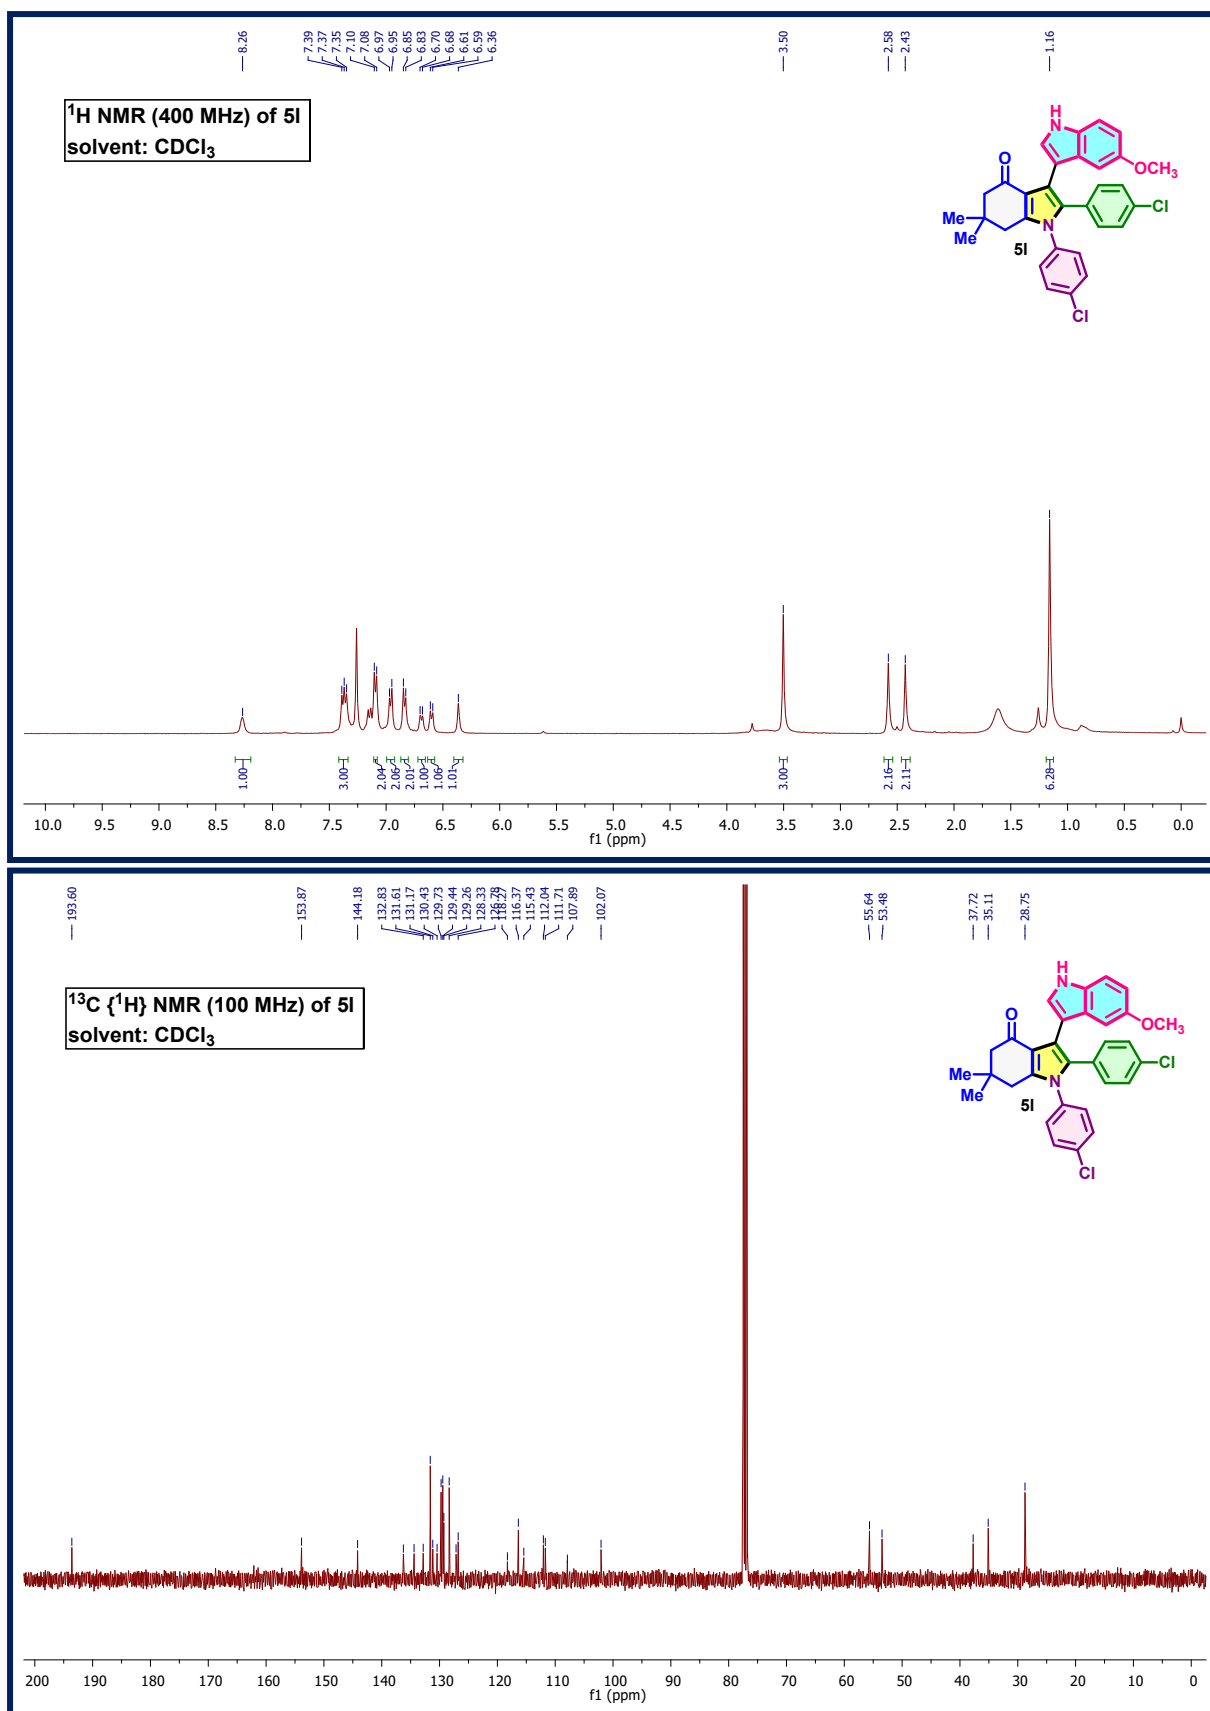

$^1\text{H}$ , and  $^{13}\text{C}\{^1\text{H}\}$  NMR spectra of **5m**

# Supporting Information

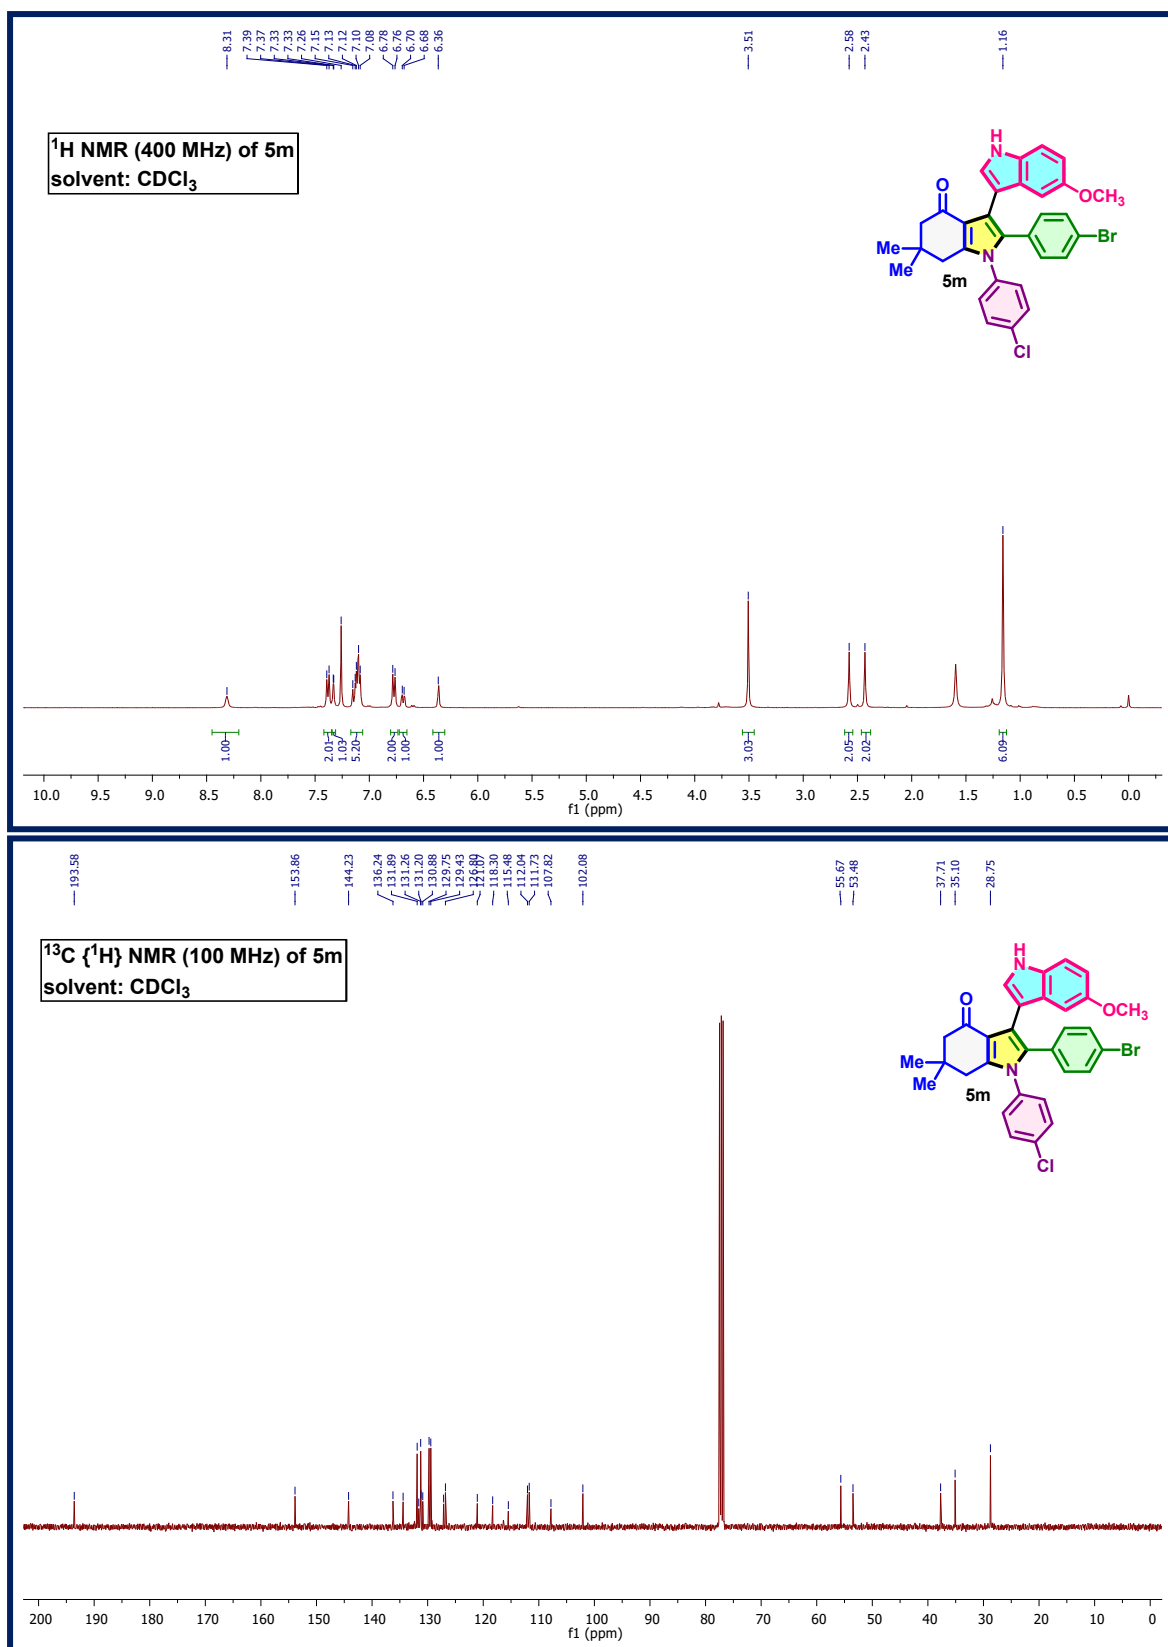

$^1\text{H}$ , and  $^{13}\text{C}\{^1\text{H}\}$  NMR spectra of 5n

# Supporting Information

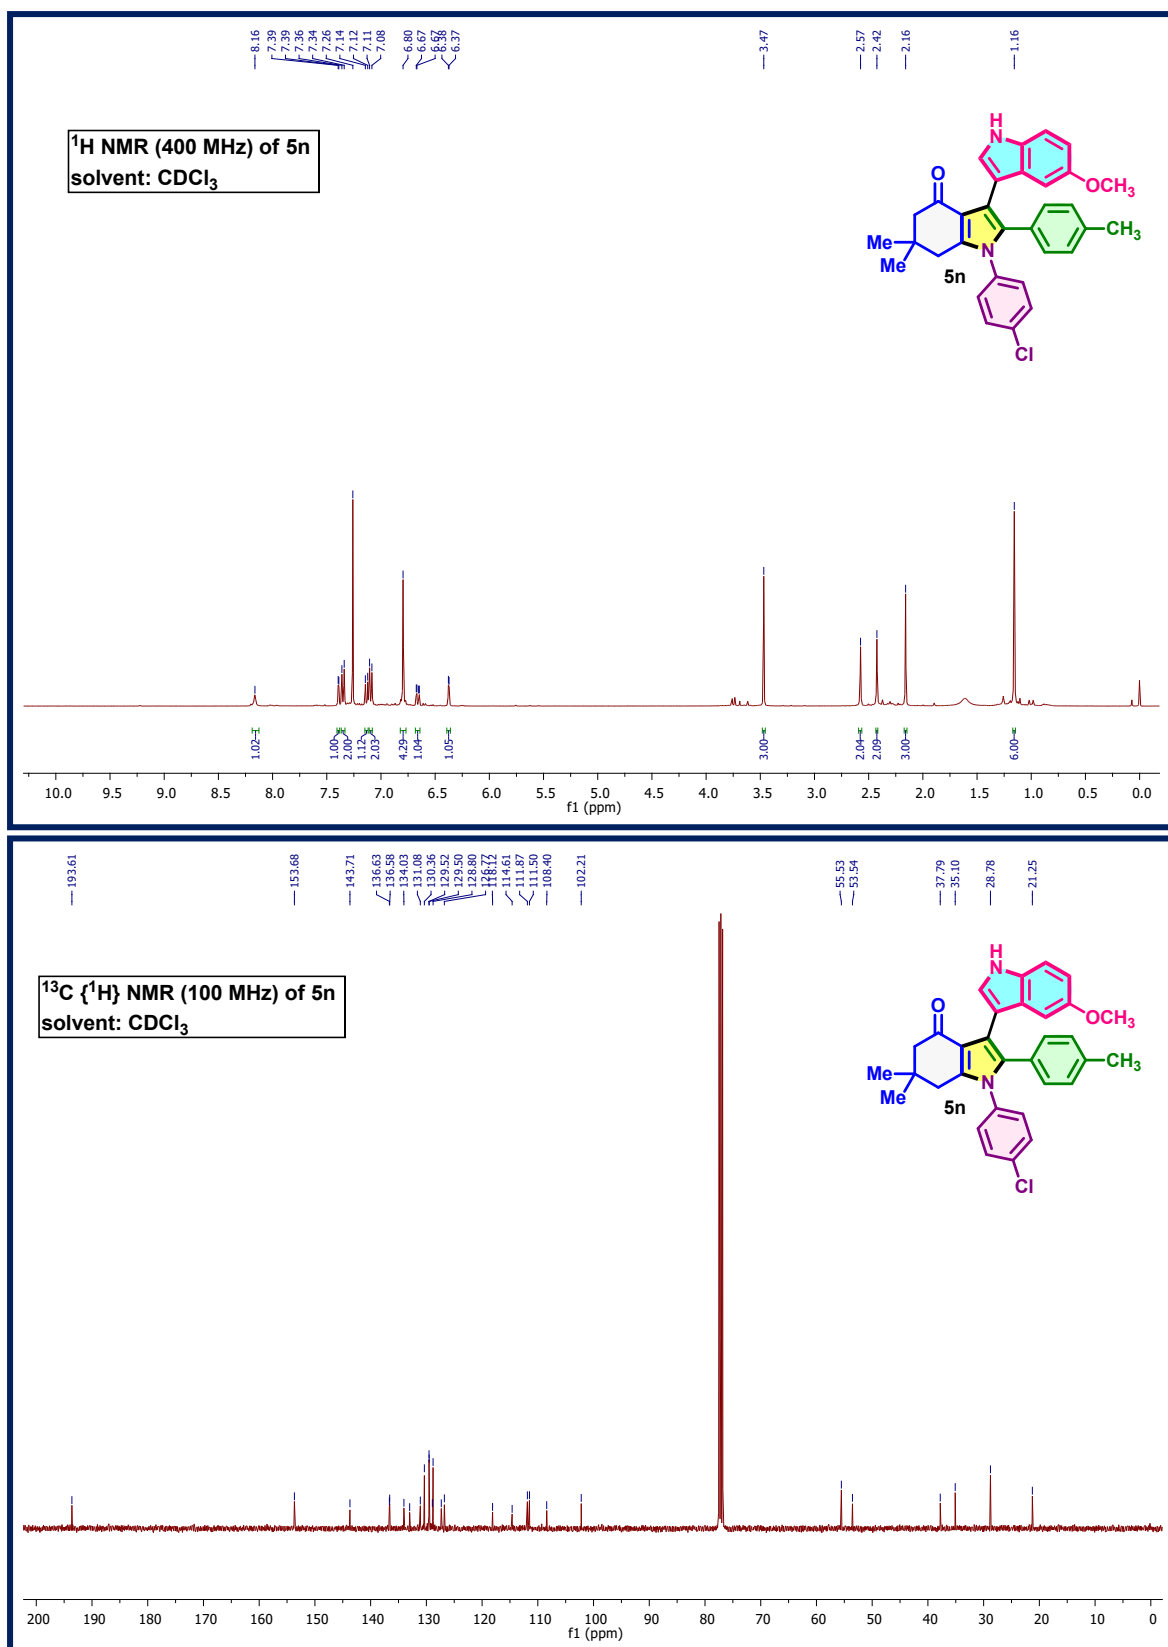

$^1\text{H}$ , and  $^{13}\text{C}\{^1\text{H}\}$  NMR spectra of 5o

# Supporting Information

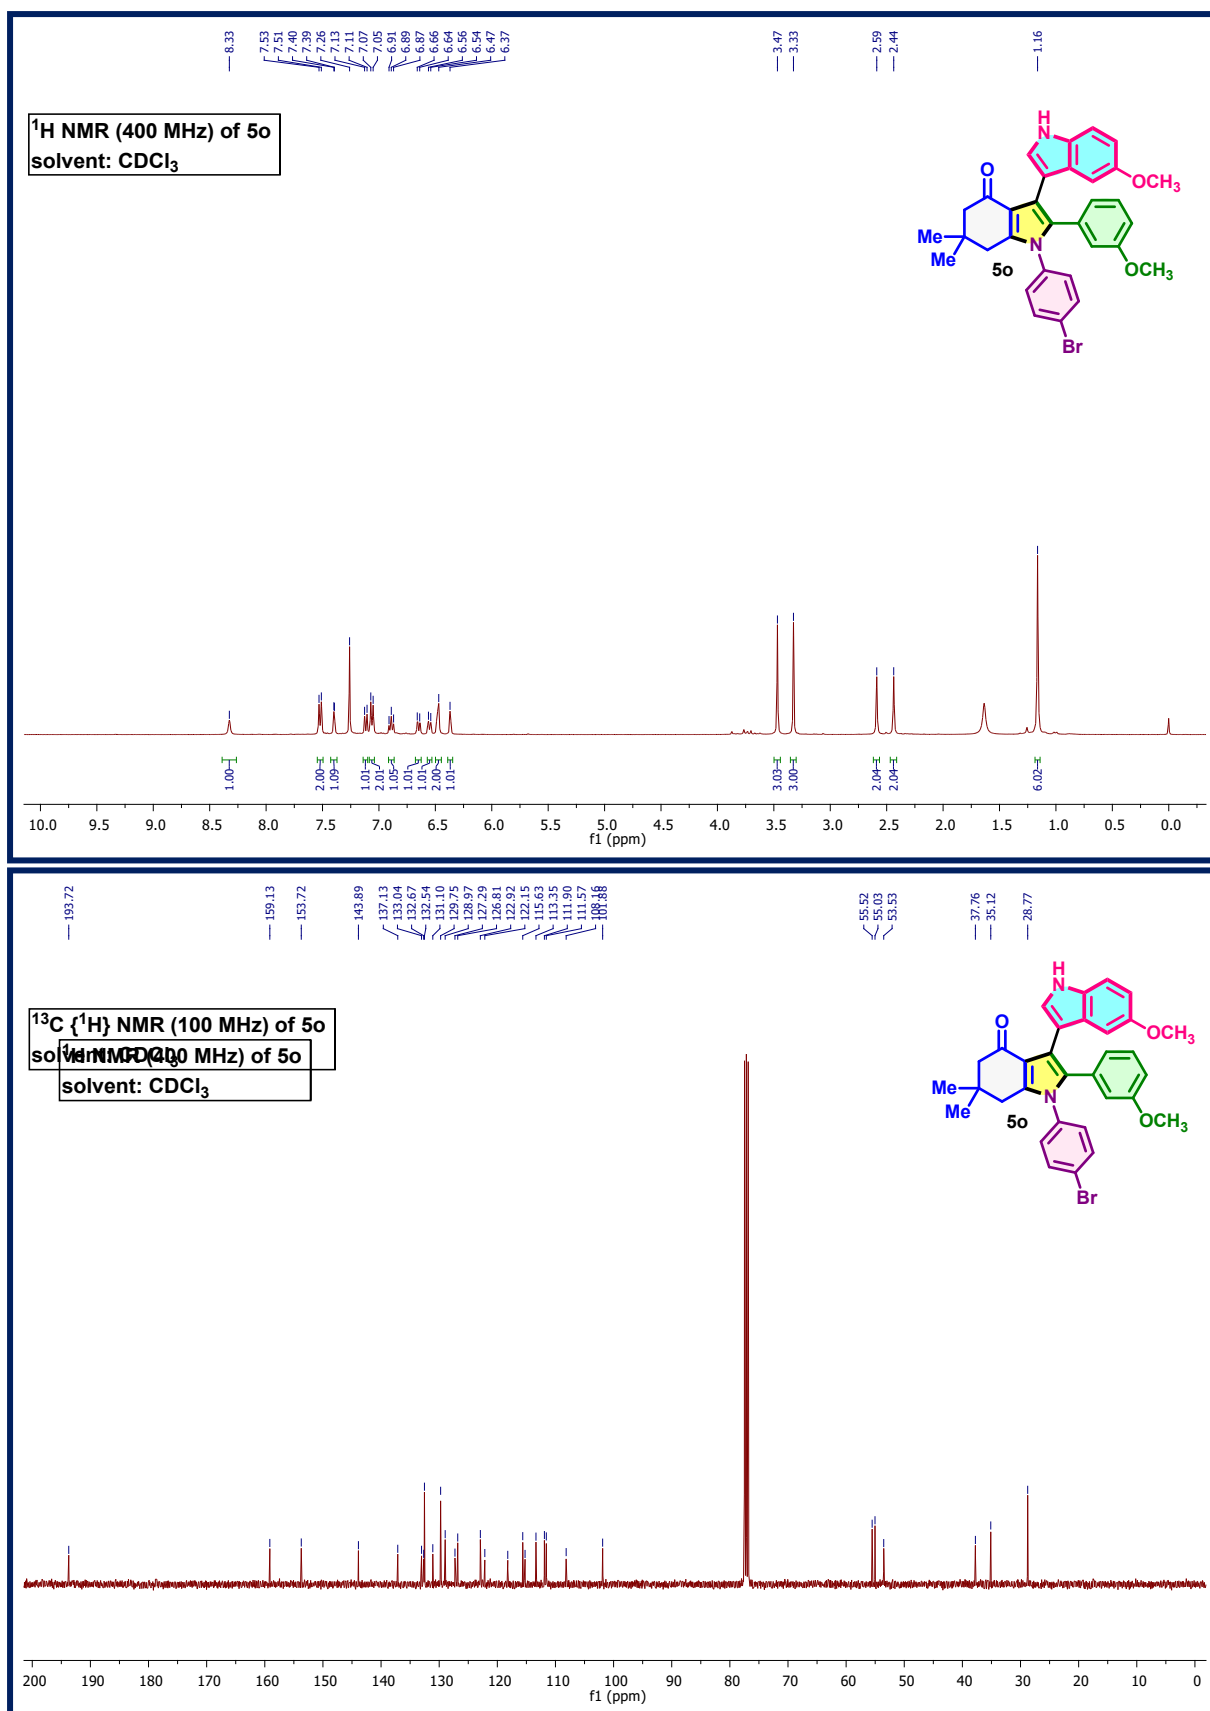

$^1\text{H}$ , and  $^{13}\text{C}\{^1\text{H}\}$  NMR spectra of 5p

# Supporting Information

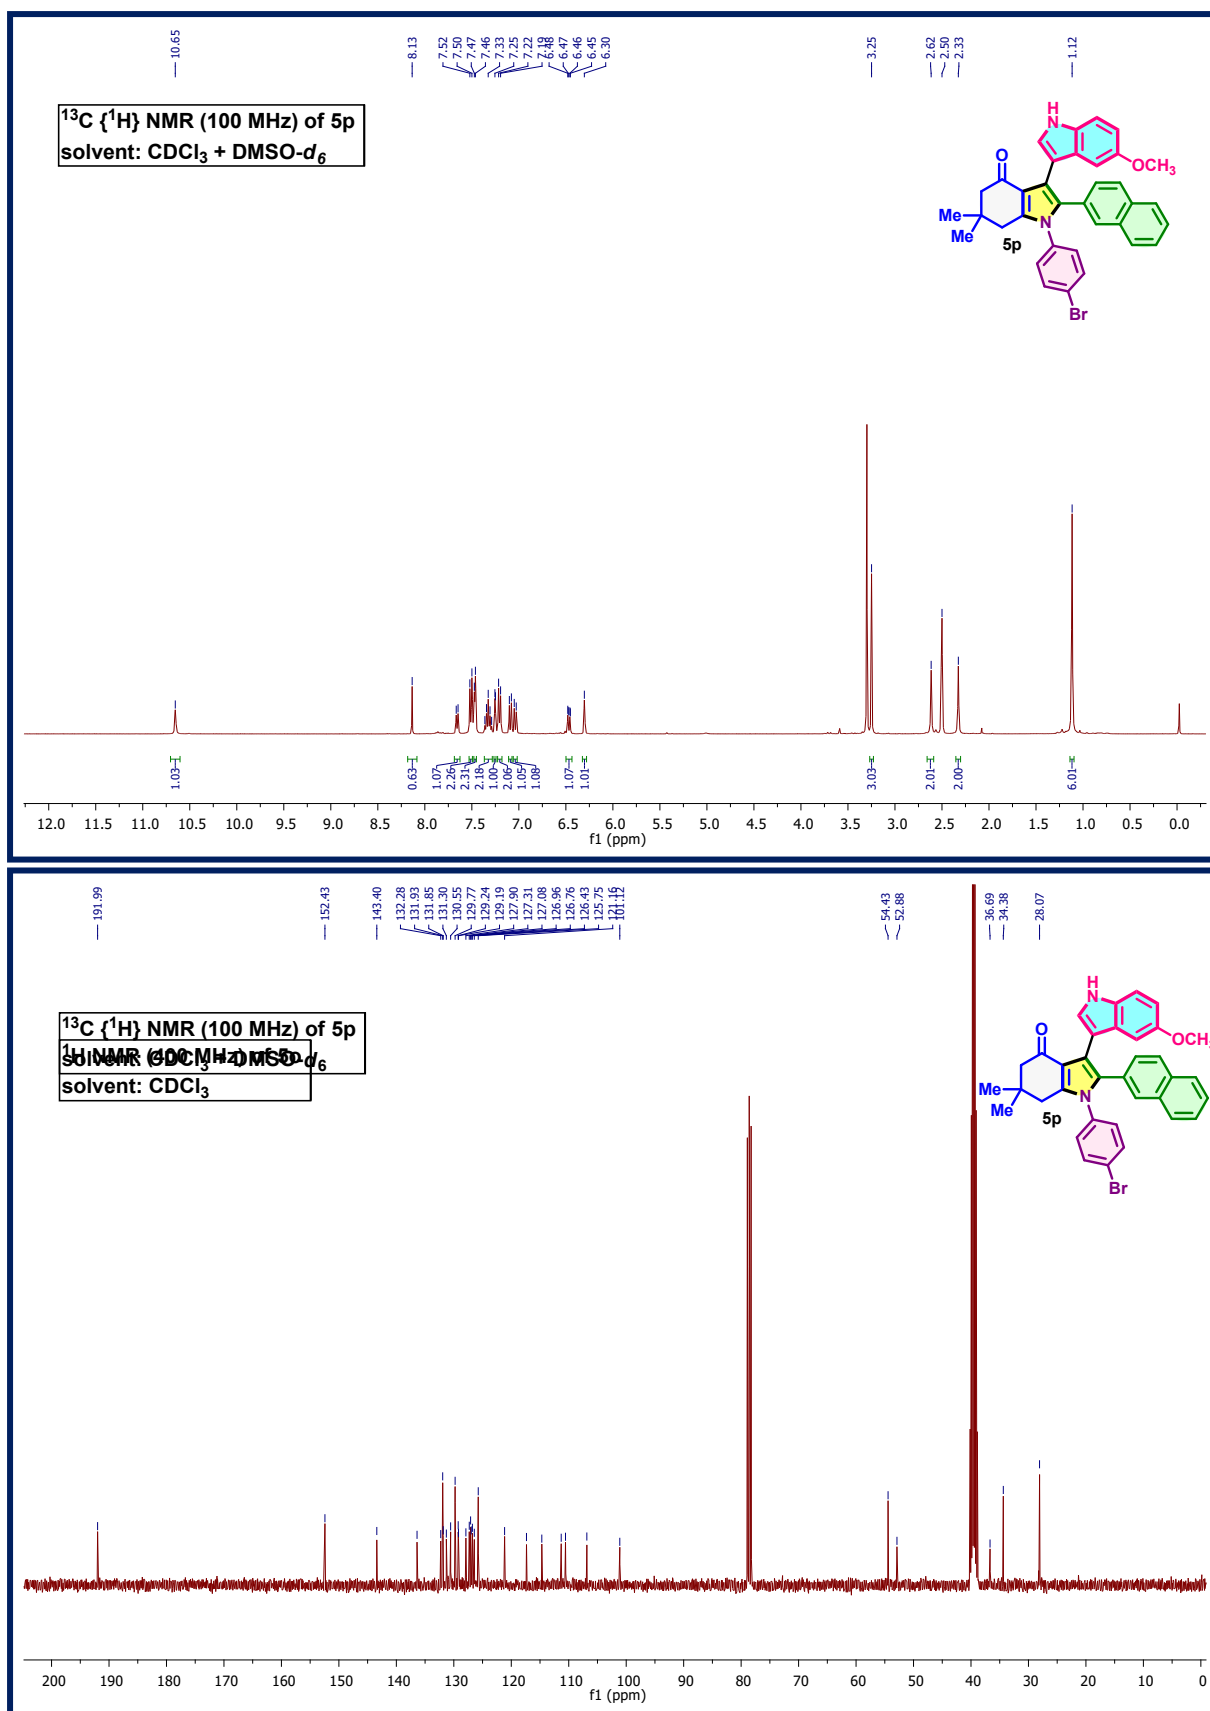

$^1\text{H}$ , and  $^{13}\text{C}\{^1\text{H}\}$  NMR spectra of 5q

# Supporting Information

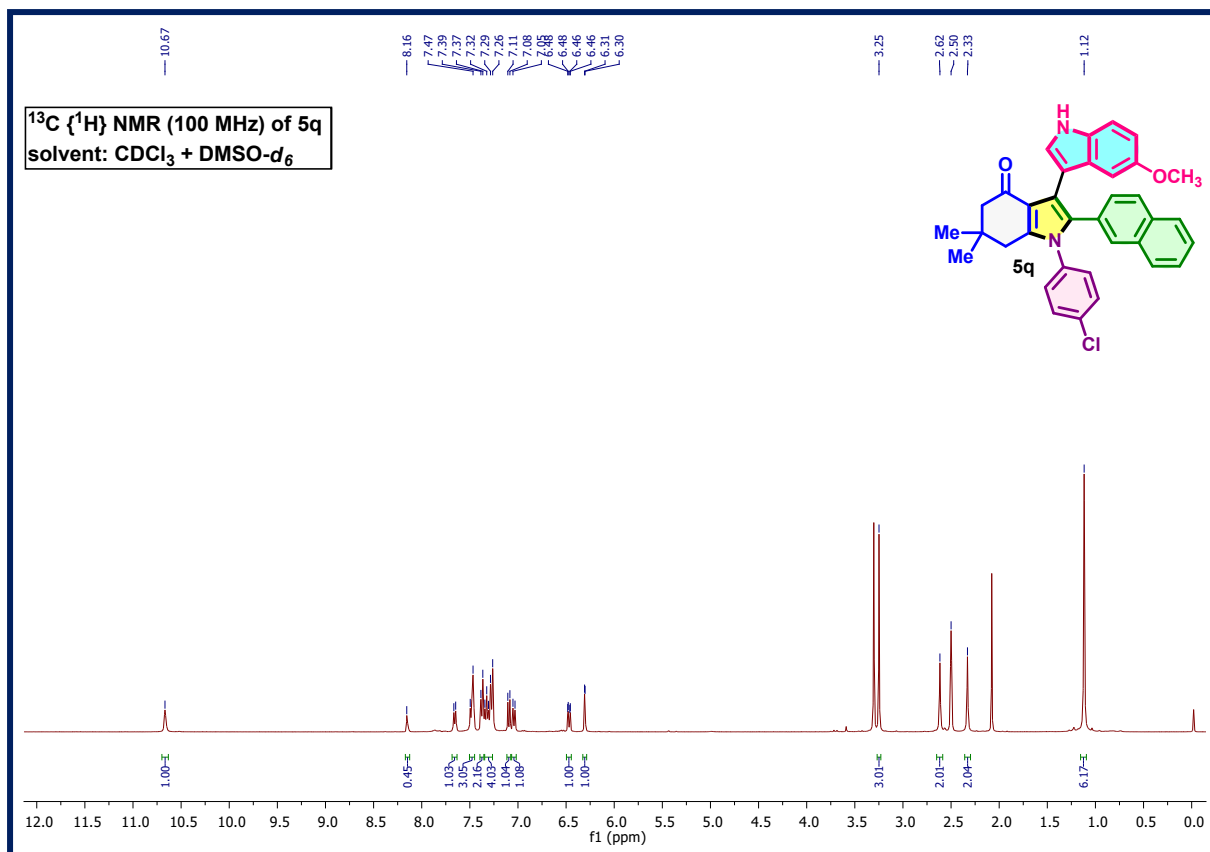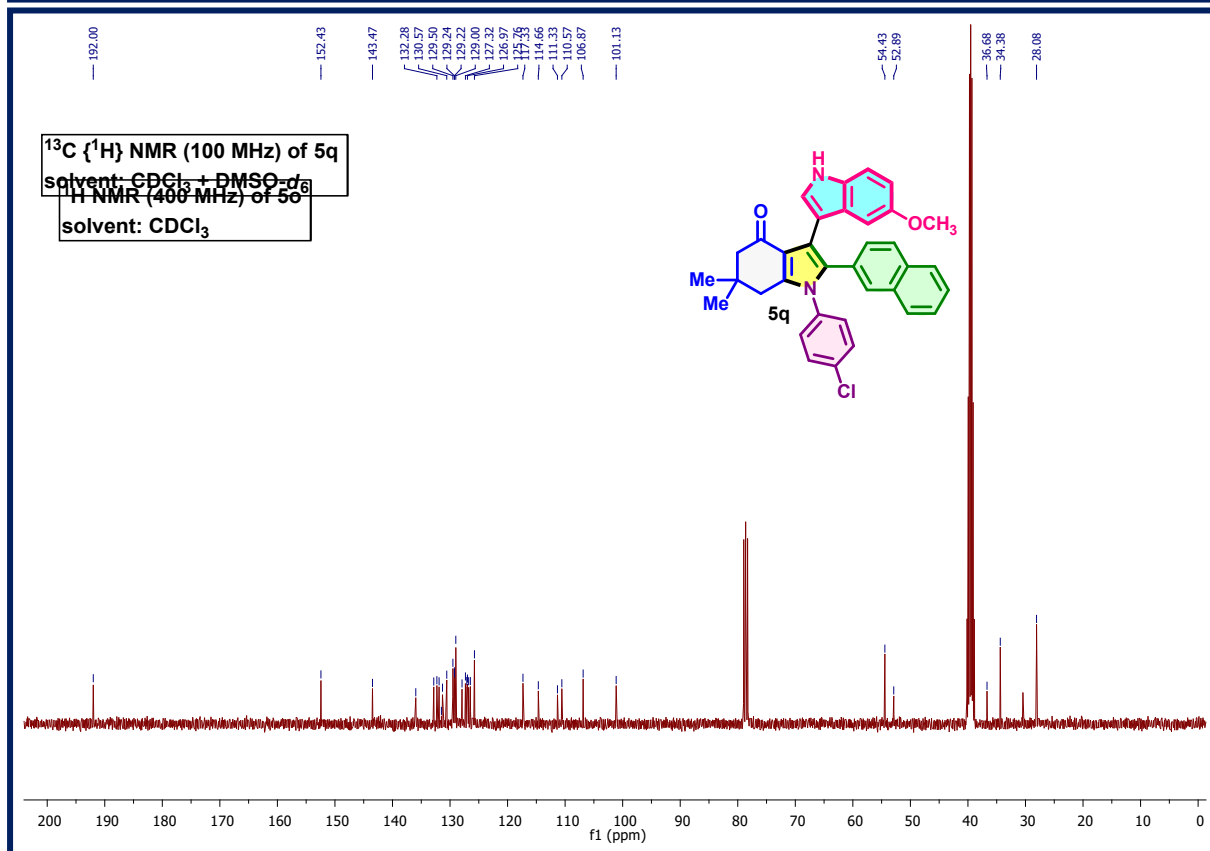

$^1\text{H}$ , and  $^{13}\text{C}\{^1\text{H}\}$  NMR spectra of **5r**

# Supporting Information

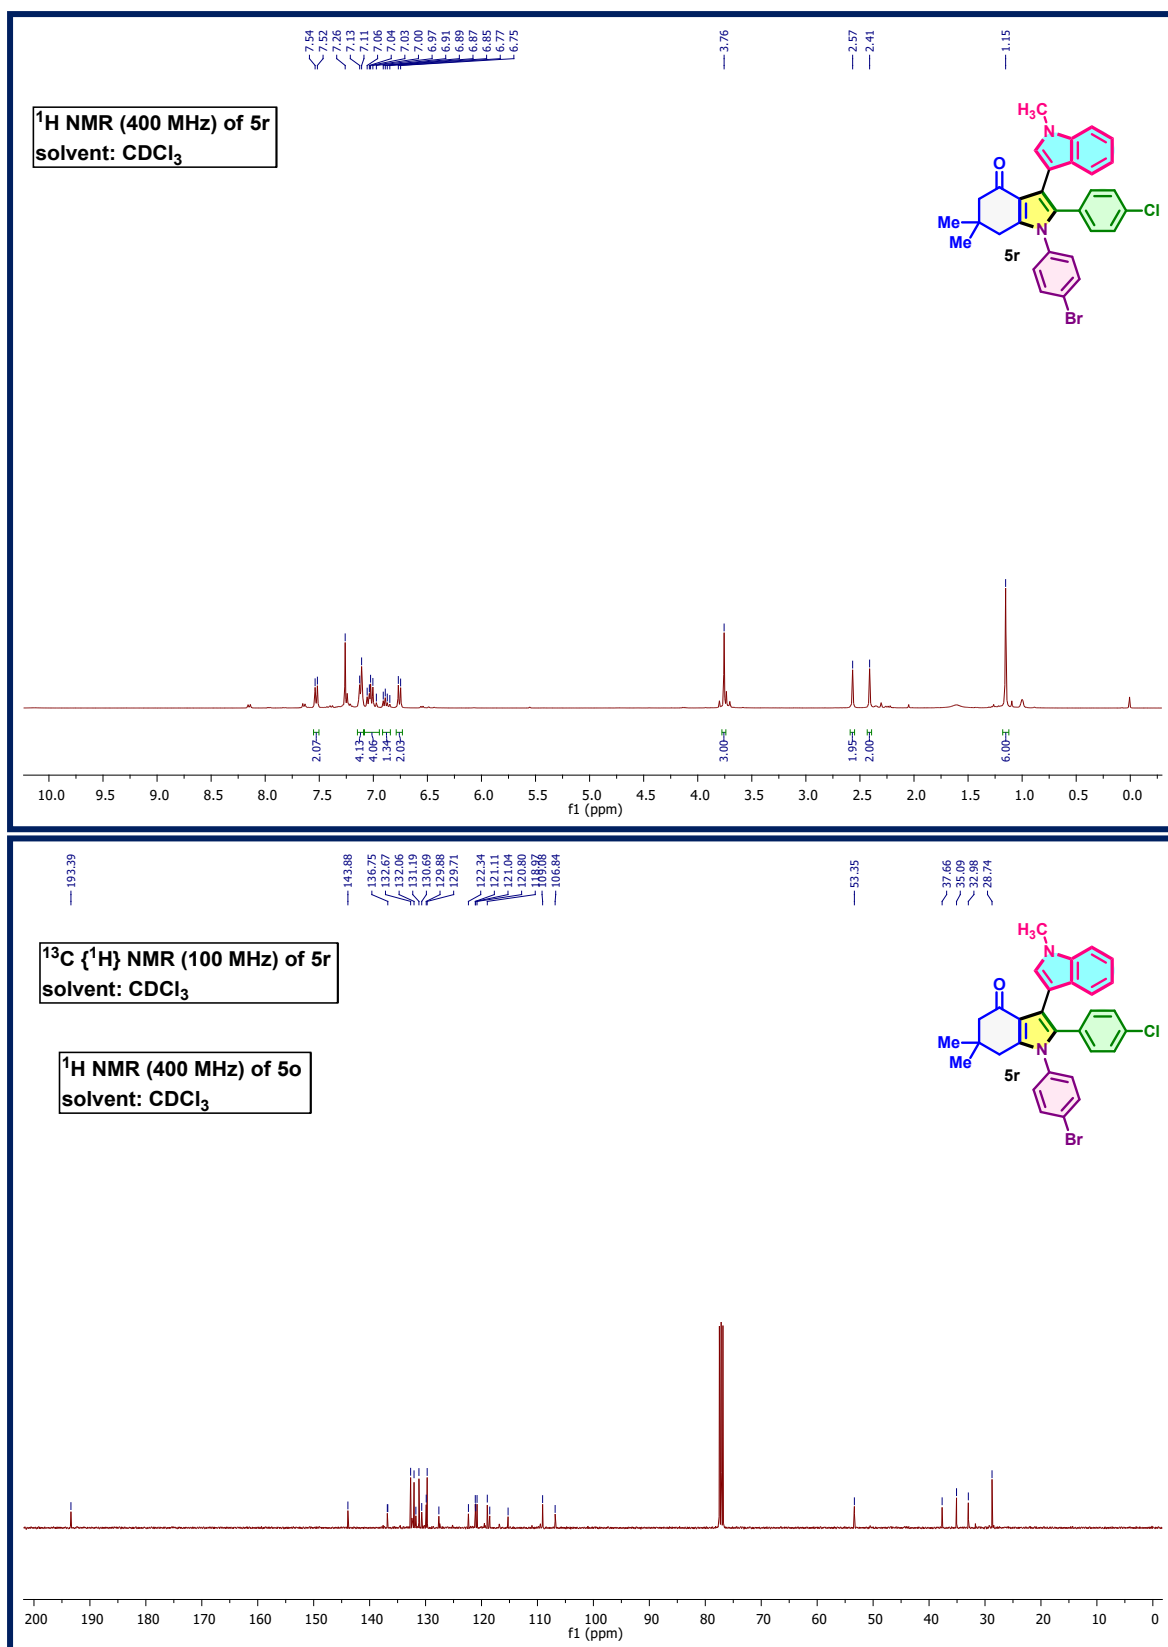

$^1\text{H}$ , and  $^{13}\text{C}\{^1\text{H}\}$  NMR spectra of 5s

# Supporting Information

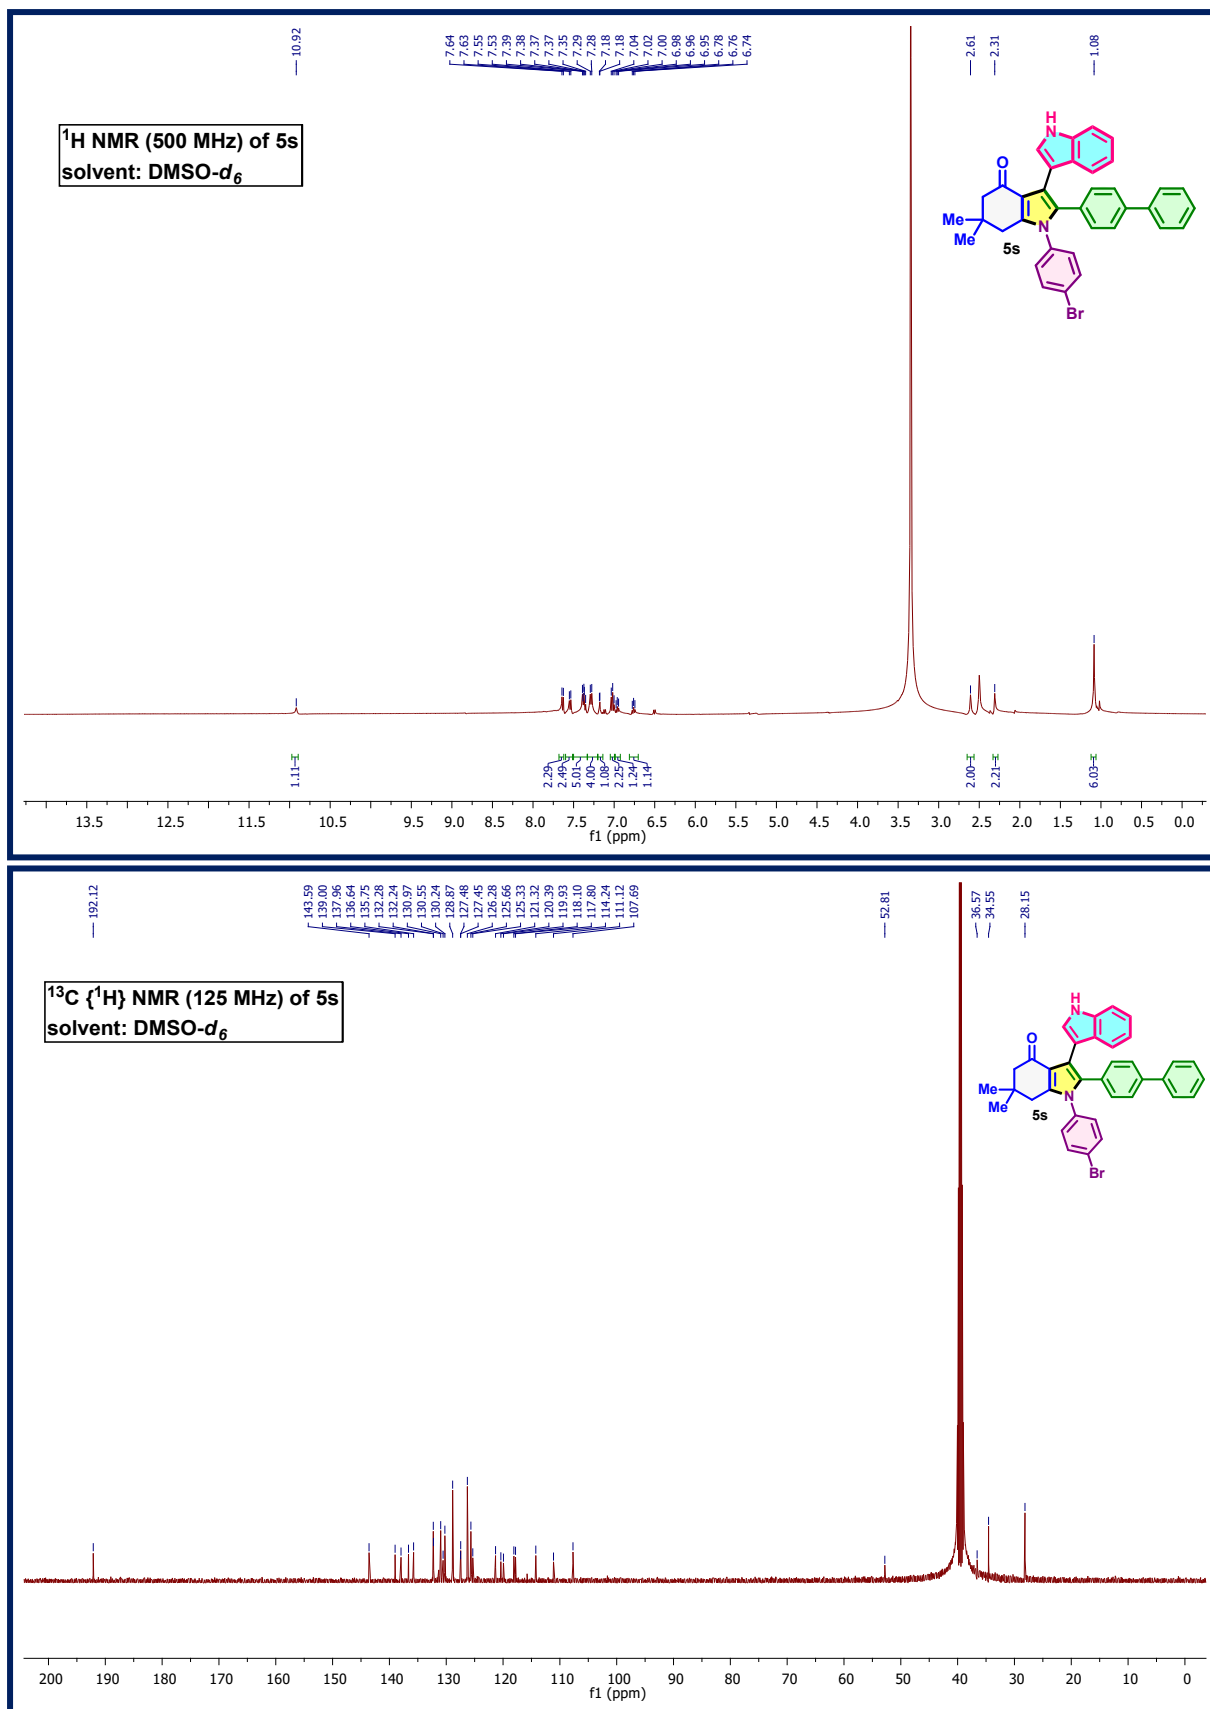

$^1\text{H}$ , and  $^{13}\text{C}\{^1\text{H}\}$  NMR spectra of 5t

# Supporting Information

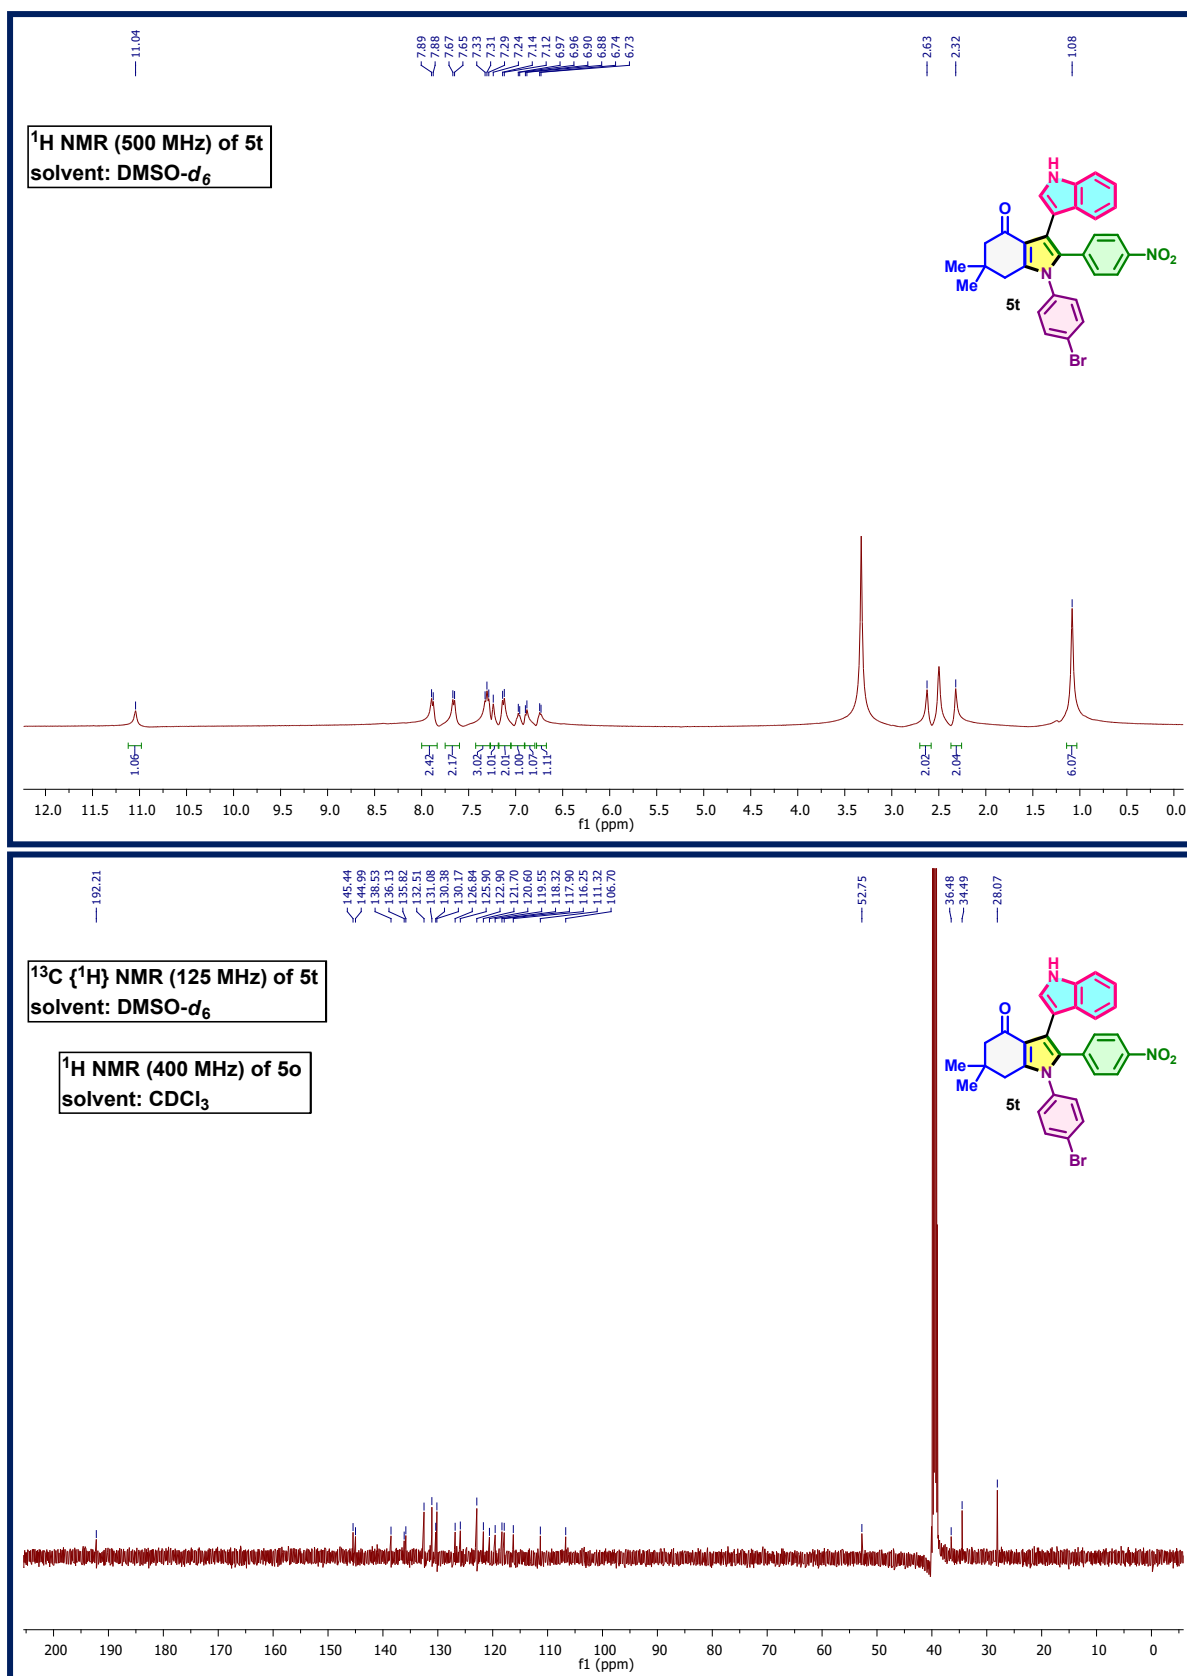

$^1\text{H}$ , and  $^{13}\text{C}\{^1\text{H}\}$  NMR spectra of 5u

# Supporting Information

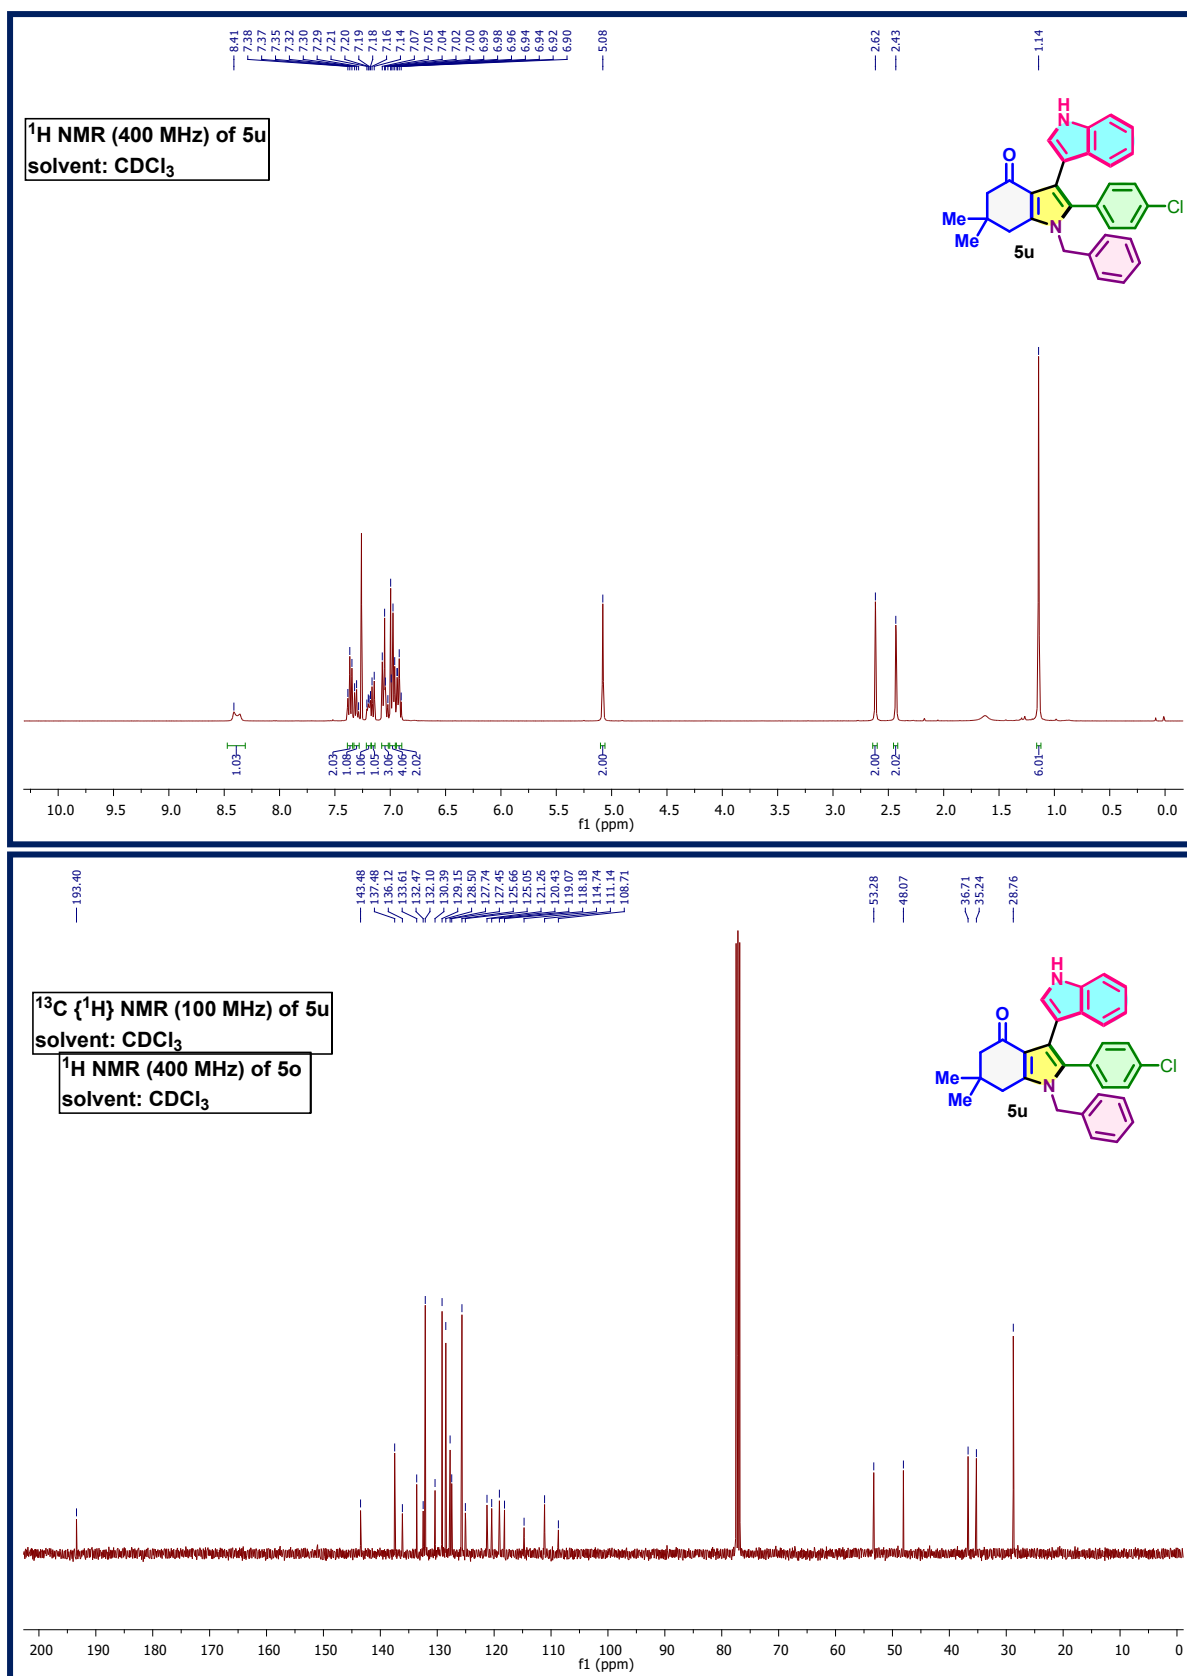

$^1\text{H}$ , and  $^{13}\text{C}\{^1\text{H}\}$  NMR spectra of 5v

# Supporting Information

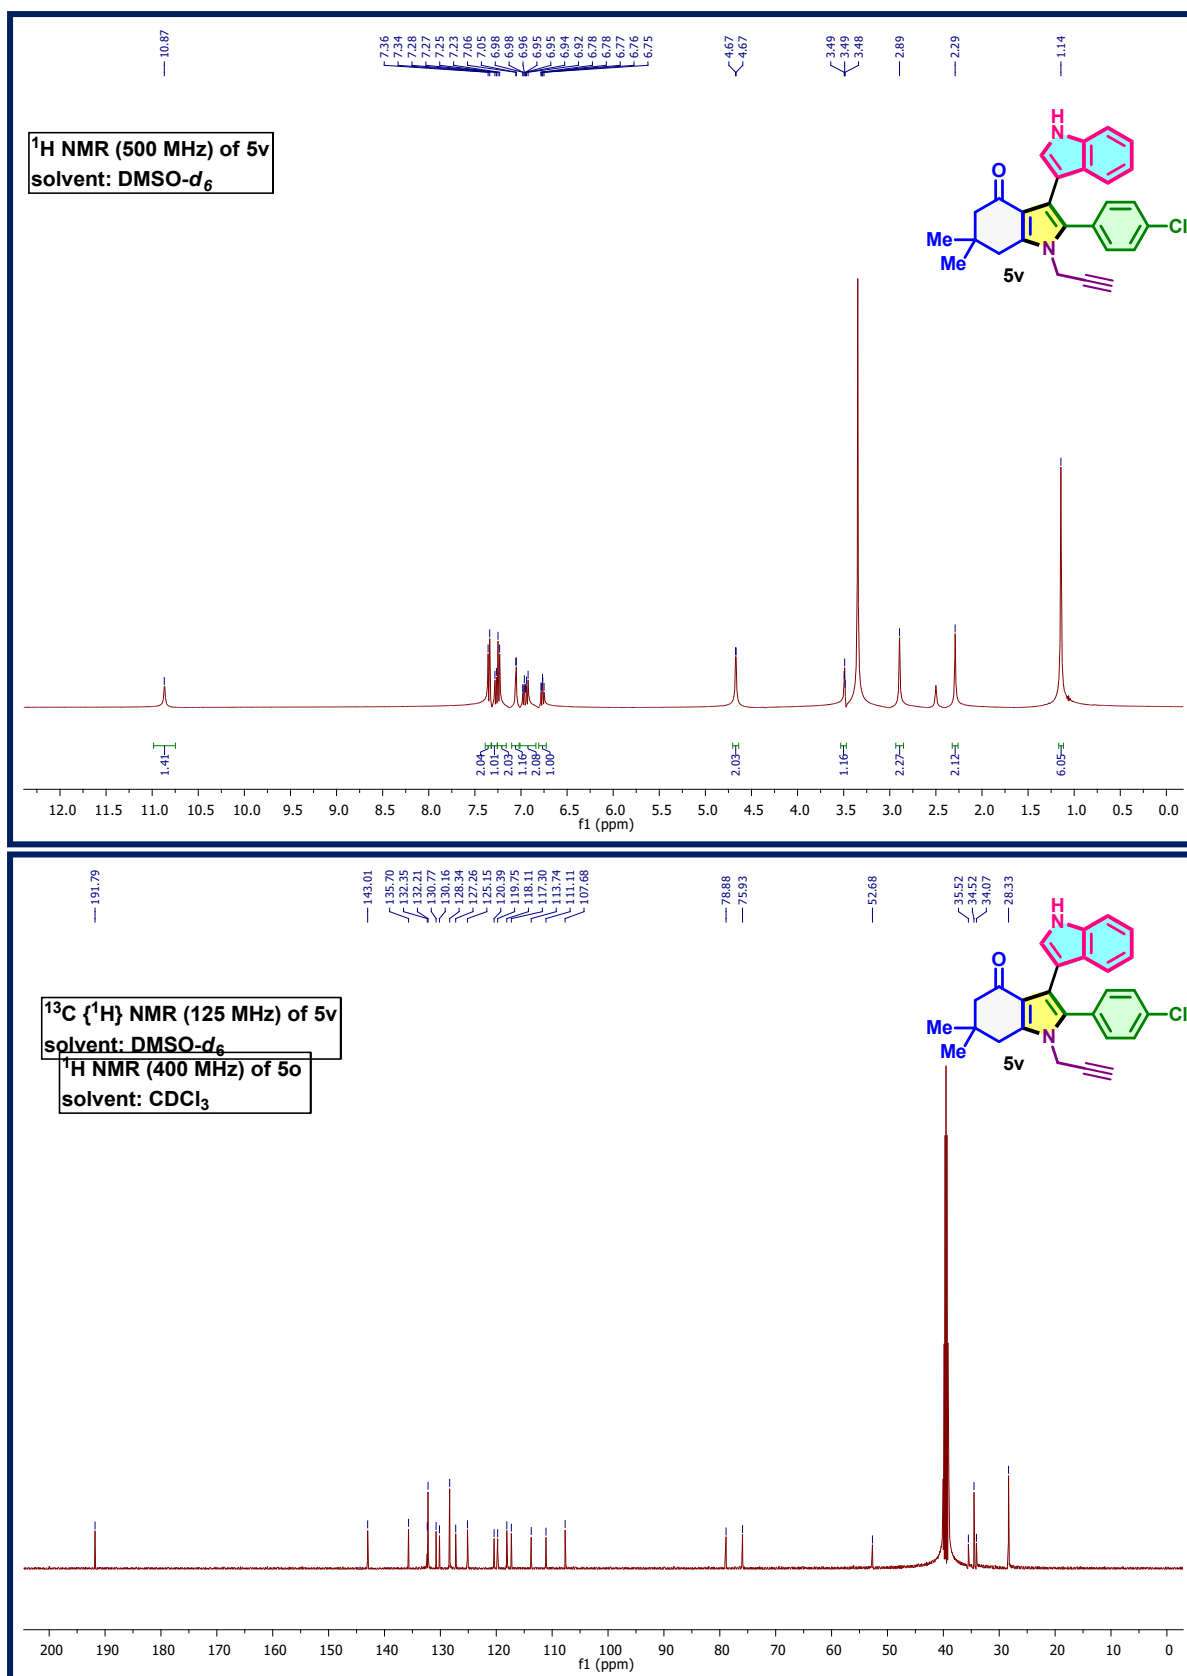

$^1\text{H}$ , and  $^{13}\text{C}\{^1\text{H}\}$  NMR spectra of **9**

## Supporting Information

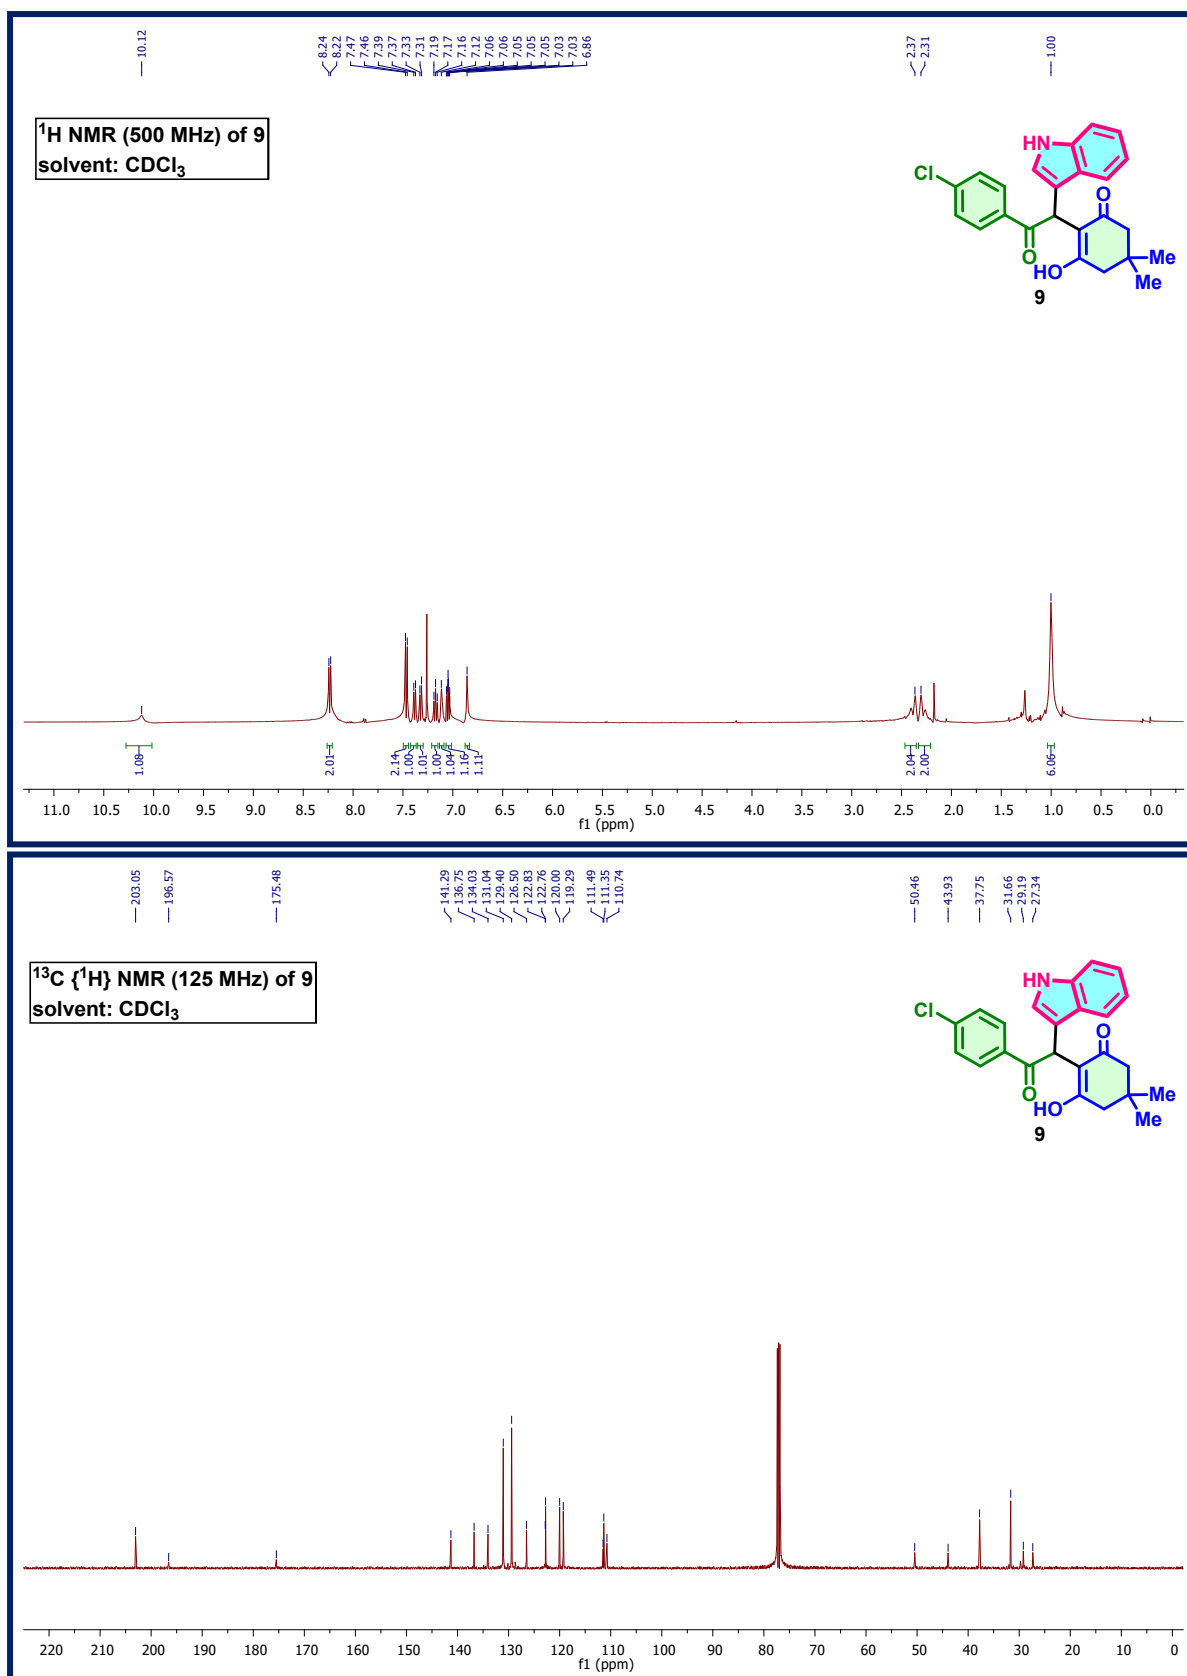

### 2. Green parameters<sup>[1]</sup> of the protocol of representative compound 5b

## Supporting Information

$$\text{Effective Mass Yield (EMY)} = \frac{\text{Mass of product}}{\text{Mass of non benign reagent}} \times 100$$

$$= \frac{0.132 \text{ g}}{0.04662 \text{ g} + 0.03502 \text{ g} + 0.02927 \text{ g} + 0.043 \text{ g}} \times 100 = 85.76 \%$$

$$\text{Atom Economy (AE)} = \frac{\text{Molecular weight of product}}{\text{Total molecular weight of reactants}} \times 100$$

$$= \frac{543.88}{186.59 + 140.17 + 117.14 + 172.02} \times 100 = 88.30\%$$

$$\text{Atom Efficiency (AEf)} = \text{AE} \times \text{Yield}\% = 88.30 \times 97 = 85.65\%$$

$$\text{Carbon Economy (CE)} = \frac{\text{Amount of carbon in the product}}{\text{Total carbon present in the reactants}} \times 100$$

$$= \frac{30 \times 0.00024}{8 \times 0.00025 + 8 \times 0.00025 + 8 \times 0.00025 + 6 \times 0.00025} \times 100 = 96\%$$

$$\text{Reaction Mass Efficiency (RME)} = \frac{\text{Mass of isolated the product}}{\text{Total mass of reactants}} \times 100$$

$$= \frac{0.132 \text{ g}}{0.04662 \text{ g} + 0.03502 \text{ g} + 0.02927 \text{ g} + 0.043 \text{ g}} \times 100 = 85.76 \%$$

$$\text{Optimum Efficiency (OE)} = \frac{\text{RME}}{\text{AE}} \times 100 = \frac{85.76}{88.30} \times 100 = 97.12\%$$

$$\text{E factor} = \frac{\text{Mass of raw materials} - \text{Mass of product}}{\text{Mass of product}}$$

$$= \frac{(0.04662 \text{ g} + 0.3502 \text{ g} + 0.02927 \text{ g}) - 0.132 \text{ g}}{0.132 \text{ g}} = 0.16 \text{ (g/g)}$$

**Eco score (E-score) calculation:**<sup>2,3</sup>

| Sl. No.             | Parameter                        | Values            | Penalty points |
|---------------------|----------------------------------|-------------------|----------------|
| 1                   | yield                            | (100-97)/2        | 1.5            |
| 2                   | Price of the reaction components | Inexpensive       | 0              |
| 3                   | Technical setup                  | Common setup      | 0              |
| 4                   | Temperature/time                 | heating, <1       | 2              |
| 5                   | Workup and purification          | Simple filtration | 0              |
| 6                   | Safety*                          | 5+5               | 10             |
| Total penalty point |                                  |                   | 13.5           |

## Supporting Information

---

\*Based on the hazard warning symbols

E-score = 100 – the sum of the individual penalties

E-score = 100 – 13.5 = **86.5** (>75, excellent synthesis).

### 3. References:

1 G. Brahmachari, N. Nayek, I. Karmakar, K. Nurjamal, S. K. Chandra, A. Bhowmick, *J. Org. Chem.*, 2020, **85**, 8405–8414.

2 K. V. Aken, L. Streckowski, L. Patiny, *Beilstein J. Org. Chem.*, 2006, **2**, 3.

3 S. Teli, S. Soni, P. Teli, N. Sahiba, S. Agarwal, *Res. Chem. Intermed.*, 2024, **50**, 1475–1495.
